# Supplementary material for: New Bicyclic Azalide Macrolides Obtained by Tandem Palladium Catalyzed Allylic Alkylation/Conjugated Addition Reaction
Source: MDPI journal article supplement (doi:10.3390/molecules27020432), 2022-01-10
Supplement: s1 [file s1]

# New Bicyclic Azalide Macrolides Obtained by Tandem Palladium Catalysed Allylic Alkylation/Conjugated Addition Reaction

Sulejman Alihodžić, Hana Čipčić Paljetak, Ana Čikoš and Ivaylo Jivkov Elenkov

|                                                                                                                                                                                                                      |    |
|----------------------------------------------------------------------------------------------------------------------------------------------------------------------------------------------------------------------|----|
| <b>Figure S1.</b> $^1\text{H}$ spectrum, structure, numbering and assignment of <b>3</b> in $\text{CDCl}_3$ at 25 °C .....                                                                                           | 2  |
| <b>Figure S2.</b> $^{13}\text{C}$ - DEPTq spectrum, structure, numbering and assignment of <b>3</b> in $\text{CDCl}_3$ at 25 °C .....                                                                                | 3  |
| <b>Figure S3.</b> $^1\text{H}$ spectrum of <b>8a</b> in $\text{CDCl}_3$ at 25 °C.....                                                                                                                                | 4  |
| <b>Figure S4.</b> $^{13}\text{C}$ - DEPTq spectrum of <b>8a</b> in $\text{CDCl}_3$ at 25 °C .....                                                                                                                    | 5  |
| <b>Figure S5.</b> $^1\text{H}$ spectrum of <b>8b</b> in $\text{CDCl}_3$ at 25 °C.....                                                                                                                                | 6  |
| <b>Figure S6.</b> $^{13}\text{C}$ - DEPTq spectrum of <b>8b</b> in $\text{CDCl}_3$ at 25 °C .....                                                                                                                    | 7  |
| <b>Figure S7.</b> $^1\text{H}$ spectrum, structure, numbering and assignment of <b>10a</b> in $\text{CDCl}_3$ at 25 °C .....                                                                                         | 8  |
| <b>Figure S8.</b> $^{13}\text{C}$ - DEPTq spectrum, structure, numbering and assignment of <b>10a</b> in $\text{CDCl}_3$ at 25 °C .....                                                                              | 9  |
| <b>Figure S9.</b> NOESY spectrum of <b>10a</b> in $\text{CDCl}_3$ at 25 °C.....                                                                                                                                      | 10 |
| <b>Figure S10.</b> $^1\text{H}$ spectrum, structure, numbering and assignment of <b>10b</b> in $\text{CDCl}_3$ at 25 °C.....                                                                                         | 11 |
| <b>Figure S11.</b> $^{13}\text{C}$ - DEPTq spectrum, structure, numbering and assignment of <b>10b</b> in $\text{CDCl}_3$ at 25 °C .....                                                                             | 12 |
| <b>Figure S12.</b> NOESY spectrum of <b>10b</b> in $\text{CDCl}_3$ at 25 °C .....                                                                                                                                    | 13 |
| <b>Figure S13.</b> $^1\text{H}$ spectrum of <b>14a</b> in $\text{CDCl}_3$ at 25 °C.....                                                                                                                              | 14 |
| <b>Figure S14.</b> $^1\text{H}$ spectrum of <b>14b</b> in $\text{CDCl}_3$ at 25 °C.....                                                                                                                              | 15 |
| <b>Figure S15.</b> $^1\text{H}$ spectrum of <b>15a</b> in $\text{CDCl}_3$ at 25 °C.....                                                                                                                              | 16 |
| <b>Figure S16.</b> $^{13}\text{C}$ -APT spectrum of <b>15a</b> in $\text{CDCl}_3$ at 25 °C .....                                                                                                                     | 17 |
| <b>Figure S17.</b> $^1\text{H}$ spectrum of <b>15b</b> in $\text{CDCl}_3$ at 25 °C.....                                                                                                                              | 18 |
| <b>Figure S18.</b> $^{13}\text{C}$ -APT spectrum of <b>15b</b> in $\text{CDCl}_3$ at 25 °C .....                                                                                                                     | 19 |
| <br><b>Table S1.</b> Comparison of $^3J_{\text{H,H}}$ coupling constants for azithromycin, <b>3</b> , <b>10a</b> and <b>10b</b> in $\text{CDCl}_3$ at 25 °C; *overlapped, the largest difference marked in red ..... | 20 |

Solvent **CHLOROFORM-d**  
Pulse Sequence **zg**  
Temperature (degree C) **25.000**  
Acquisition Time (sec) **8.6508**  
Number of Transients **16**  
Points Count **65536**  
Sweep Width (Hz) **7575.64**  
Spectrum Offset (Hz) **3196.8706**  
Original Points Count **65536**  
Nucleus **<sup>1</sup>H**  
Frequency (MHz) **400.1300**

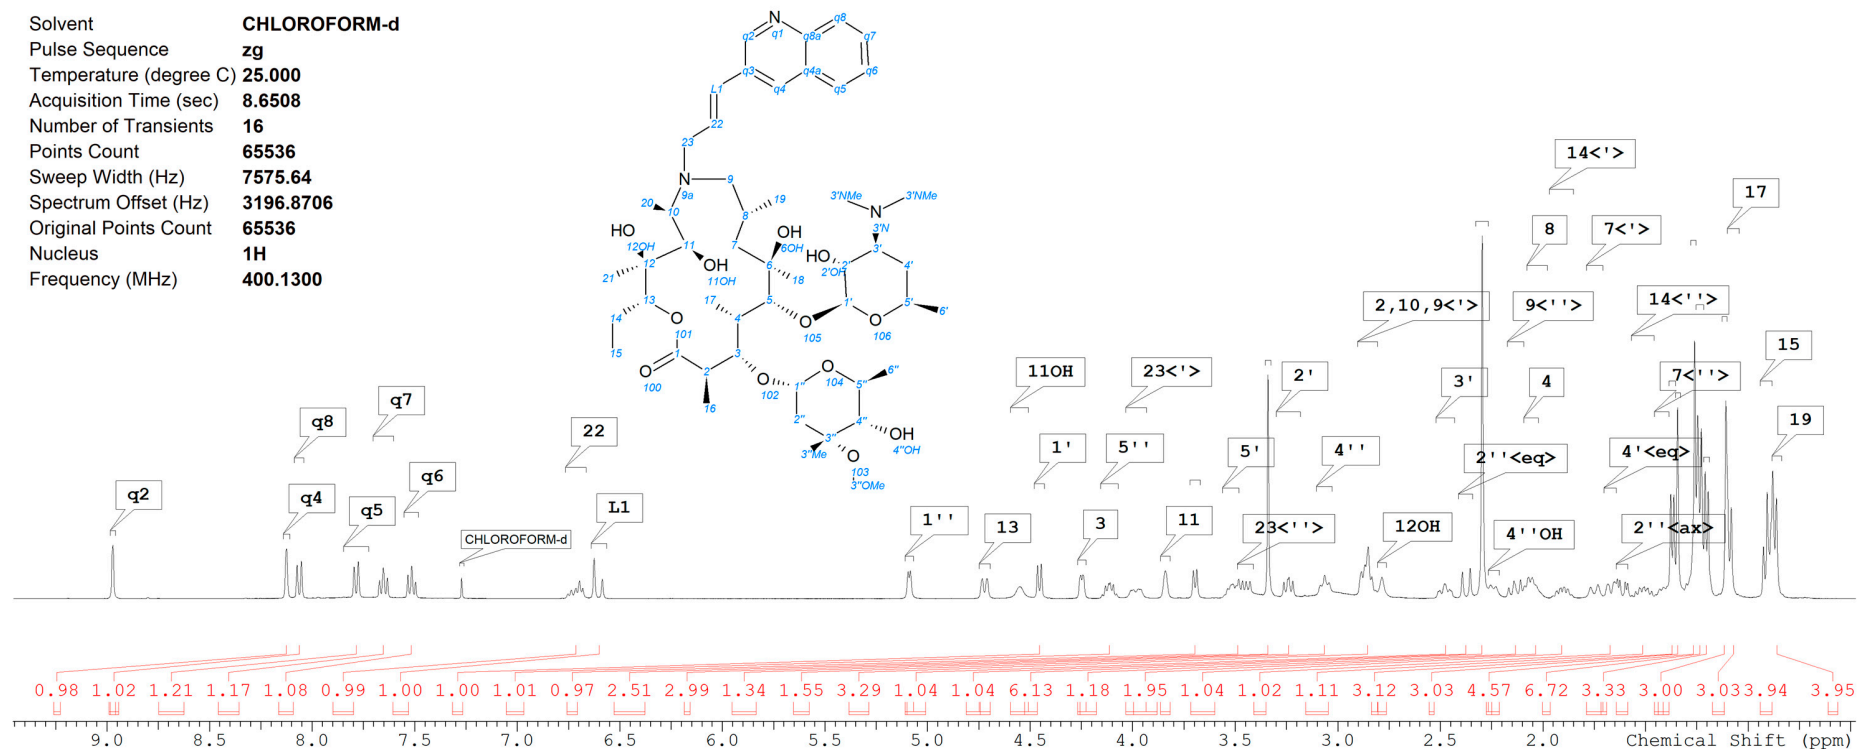

| Shift1 (ppm) | H's   | Type   | J (Hz)         | Atom1          | Multiplet1 | Shift1 (ppm) | H's   | Type  | J (Hz)         | Atom1        | Multiplet1 | Shift1 (ppm) | H's   | Type  | J (Hz)         | Atom1 | Multiplet1 |
|--------------|-------|--------|----------------|----------------|------------|--------------|-------|-------|----------------|--------------|------------|--------------|-------|-------|----------------|-------|------------|
| 0.872        | 3.000 | br d   | 7.1            | 19             | M01        | 2.140        | 1.000 | dd    | 11.0, 10.5     | 9<">         | M38        | 4.456        | 1.000 | d     | 7.2            | 1'    | M22        |
| 0.908        | 3.000 | t      | 7.4            | 15             | M45        | 2.243        | 1.000 | br d  | 10.2           | 4"OH         | M10        | 4.553        | 1.000 | m     | -              | 11OH  | M23        |
| 1.092        | 3.000 | d      | 7.3            | 17             | M02        | 2.297        | 6.000 | s     | -              | 3'NMe, 3'NMe | M37        | 4.723        | 1.000 | br dd | 9.4, 1.6       | 13    | M24        |
| 1.109        | 3.000 | s      | -              | 21             | M44        | 2.375        | 1.000 | d     | 15.0           | 2"<eq>       | M36        | 5.090        | 1.000 | br d  | 4.6            | 1"    | M25        |
| 1.203        | 3.000 | d      | 6.1            | 6'             | M03        | 2.479        | 1.000 | ddd   | 12.9, 9.8, 3.6 | 3'           | M11        | 6.606        | 1.000 | d     | 16.0           | L1    | M26        |
| 1.238        | 7.000 | br d   | 6.9            | 4'<ax>, 20, 16 | M42        | 2.786        | 1.000 | br s  | -              | 12OH         | M12        | 6.718        | 1.000 | ddd   | 16.0, 7.0, 6.0 | 22    | M27        |
| 1.261        | 3.000 | s      | -              | 3"Me           | M43        | 2.858        | 3.000 | m     | -              | 2, 10, 9<">  | M35        | 7.516        | 1.000 | t     | 7.2            | q6    | M28        |
| 1.344        | 3.000 | s      | -              | 18             | M04        | 3.064        | 1.000 | br t  | 8.6            | 4"           | M13        | 7.654        | 1.000 | t     | 7.6            | q7    | M29        |
| 1.370        | 3.000 | d      | 6.1            | 6"             | M40        | 3.242        | 1.000 | br dd | 9.8, 7.5       | 2'           | M14        | 7.786        | 1.000 | d     | 8.2            | q5    | M30        |
| 1.422        | 1.000 | dd     | 15.7, 7.4      | 7<">           | M41        | 3.341        | 3.000 | s     | -              | 3"OMe        | M15        | 8.064        | 1.000 | d     | 8.3            | q8    | M31        |
| 1.510        | 1.000 | ddq    | 14.6, 9.3, 7.4 | 14<">          | M05        | 3.457        | 1.000 | br dd | 14.4, 7.4      | 23<">        | M16        | 8.126        | 1.000 | s     | -              | q4    | M32        |
| 1.613        | 1.000 | dd     | 15.2, 4.8      | 2"<ax>         | M06        | 3.516        | 1.000 | dq    | 10.4, 6.0      | 5'           | M34        | 8.972        | 1.000 | s     | -              | q2    | M33        |
| 1.668        | 1.000 | br ddd | 12.9, 2.0      | 4'<eq>         | M39        | 3.697        | 1.000 | d     | 6.7            | 5            | M17        |              |       |       |                |       |            |
| 1.750        | 1.000 | br d   | 14.2           | 7<">           | M07        | 3.842        | 1.000 | d     | 1.2            | 11           | M18        |              |       |       |                |       |            |
| 1.907        | 1.000 | dqd    | 14.4, 7.7, 1.4 | 14<">          | M08        | 3.985        | 1.000 | br dd | 13.8, 4.9      | 23<">        | M19        |              |       |       |                |       |            |
| 2.029        | 1.000 | m      | -              | 8              | M46        | 4.115        | 1.000 | dq    | 9.6, 6.0       | 5"           | M20        |              |       |       |                |       |            |
| 2.062        | 1.000 | br q   | 7.4            | 4              | M09        | 4.249        | 1.000 | br dd | 4.0, 1.6       | 3            | M21        |              |       |       |                |       |            |

**Figure S1.** <sup>1</sup>H spectrum, structure, numbering and assignment of **3** in CDCl<sub>3</sub> at 25 °C

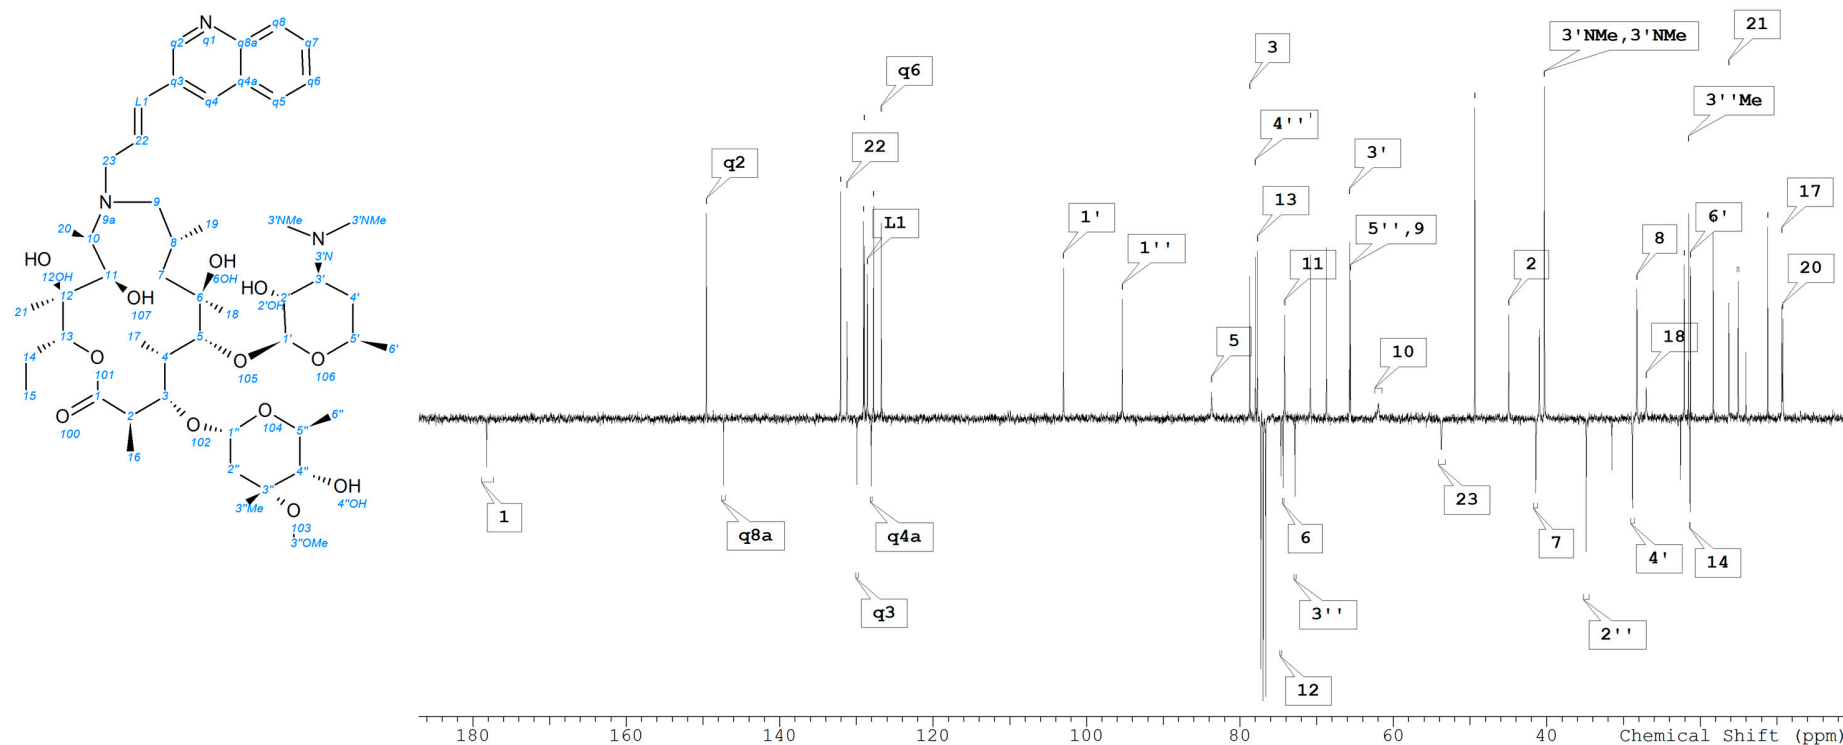

| Shift1 (ppm) | C's   | Type | Atom1        | Multiplet1 | Shift1 (ppm) | C's   | Type | Atom1 | Multiplet1 | Shift1 (ppm) | C's   | Type | Atom1 | Multiplet1 | Shift1 (ppm) | C's   | Type | Atom1 | Multiplet1 |
|--------------|-------|------|--------------|------------|--------------|-------|------|-------|------------|--------------|-------|------|-------|------------|--------------|-------|------|-------|------------|
| 9.258        | 1.000 | s    | 20           | M01        | 40.989       | 1.000 | s    |       | M14        | 78.014       | 1.000 | s    | 4"    | M23        | 149.586      | 1.000 | s    | q2    | M36        |
| 9.389        | 1.000 | s    | 17           | M02        | 41.441       | 1.000 | s    | 7     | M45        | 78.744       | 1.000 | s    | 3     | M24        | 178.240      | 1.000 | s    | 1     | M37        |
| 11.212       | 1.000 | s    | 15           | M03        | 44.985       | 1.000 | s    | 2     | M15        | 83.716       | 1.000 | br s | 5     | M26        |              |       |      |       |            |
| 15.076       | 1.000 | s    | 16           | M04        | 49.403       | 1.000 | s    | 3"OMe | M16        | 95.353       | 1.000 | s    | 1"    | M27        |              |       |      |       |            |
| 16.286       | 1.000 | s    | 21           | M06        | 53.778       | 1.000 | br s | 23    | M44        | 103.024      | 1.000 | s    | 1'    | M28        |              |       |      |       |            |
| 18.328       | 1.000 | s    | 6"           | M07        | 61.959       | 1.000 | br s | 10    | M43        | 126.778      | 1.000 | s    | q6    | M29        |              |       |      |       |            |
| 21.317       | 1.000 | s    | 6'           | M08        | 65.619       | 2.000 | s    | 5", 9 | M17        | 127.799      | 1.000 | s    | q5    | M30        |              |       |      |       |            |
| 21.347       | 1.000 | s    | 14           | M48        | 65.736       | 1.000 | s    | 3'    | M18        | 128.076      | 1.000 | s    | q4a   | M40        |              |       |      |       |            |
| 21.536       | 1.000 | s    | 3"Me         | M09        | 68.755       | 1.000 | s    | 5'    | M19        | 128.601      | 1.000 | s    | L1    | M31        |              |       |      |       |            |
| 22.105       | 1.000 | s    | 19           | M10        | 70.840       | 1.000 | s    | 2'    | M20        | 128.980      | 1.000 | s    | q7    | M32        |              |       |      |       |            |
| 27.048       | 1.000 | s    | 18           | M11        | 72.838       | 1.000 | s    | 3"    | M42        | 129.112      | 1.000 | s    | q8    | M33        |              |       |      |       |            |
| 28.273       | 1.000 | s    | 8            | M12        | 74.179       | 1.000 | s    | 11    | M21        | 129.957      | 1.000 | s    | q3    | M39        |              |       |      |       |            |
| 28.857       | 1.000 | s    | 4'           | M47        | 74.383       | 1.000 | s    | 6     | M41        | 131.255      | 1.000 | s    | 22    | M34        |              |       |      |       |            |
| 34.894       | 1.000 | s    | 2"           | M46        | 74.675       | 1.000 | s    | 12    | M25        | 132.087      | 1.000 | s    | q4    | M35        |              |       |      |       |            |
| 40.333       | 2.000 | s    | 3'NMe, 3'NMe | M13        | 77.752       | 1.000 | s    | 13    | M22        | 147.354      | 1.000 | s    | q8a   | M38        |              |       |      |       |            |

Solvent **CHLOROFORM-d**

Pulse Sequence **deptqgpsp.2**

Temperature (degree C) **25.000**

Acquisition Time (sec) **0.3408**

Number of Transients **1000**

Points Count **16384**

Sweep Width (Hz) **24036.99**

Spectrum Offset (Hz) **11063.1299**

Original Points Count **8192**

Nucleus **13C**

Frequency (MHz) **100.6128**

**Figure S2.**  $^{13}\text{C}$ -DEPTq spectrum, structure, numbering and assignment of **3** in  $\text{CDCl}_3$  at 25 °C

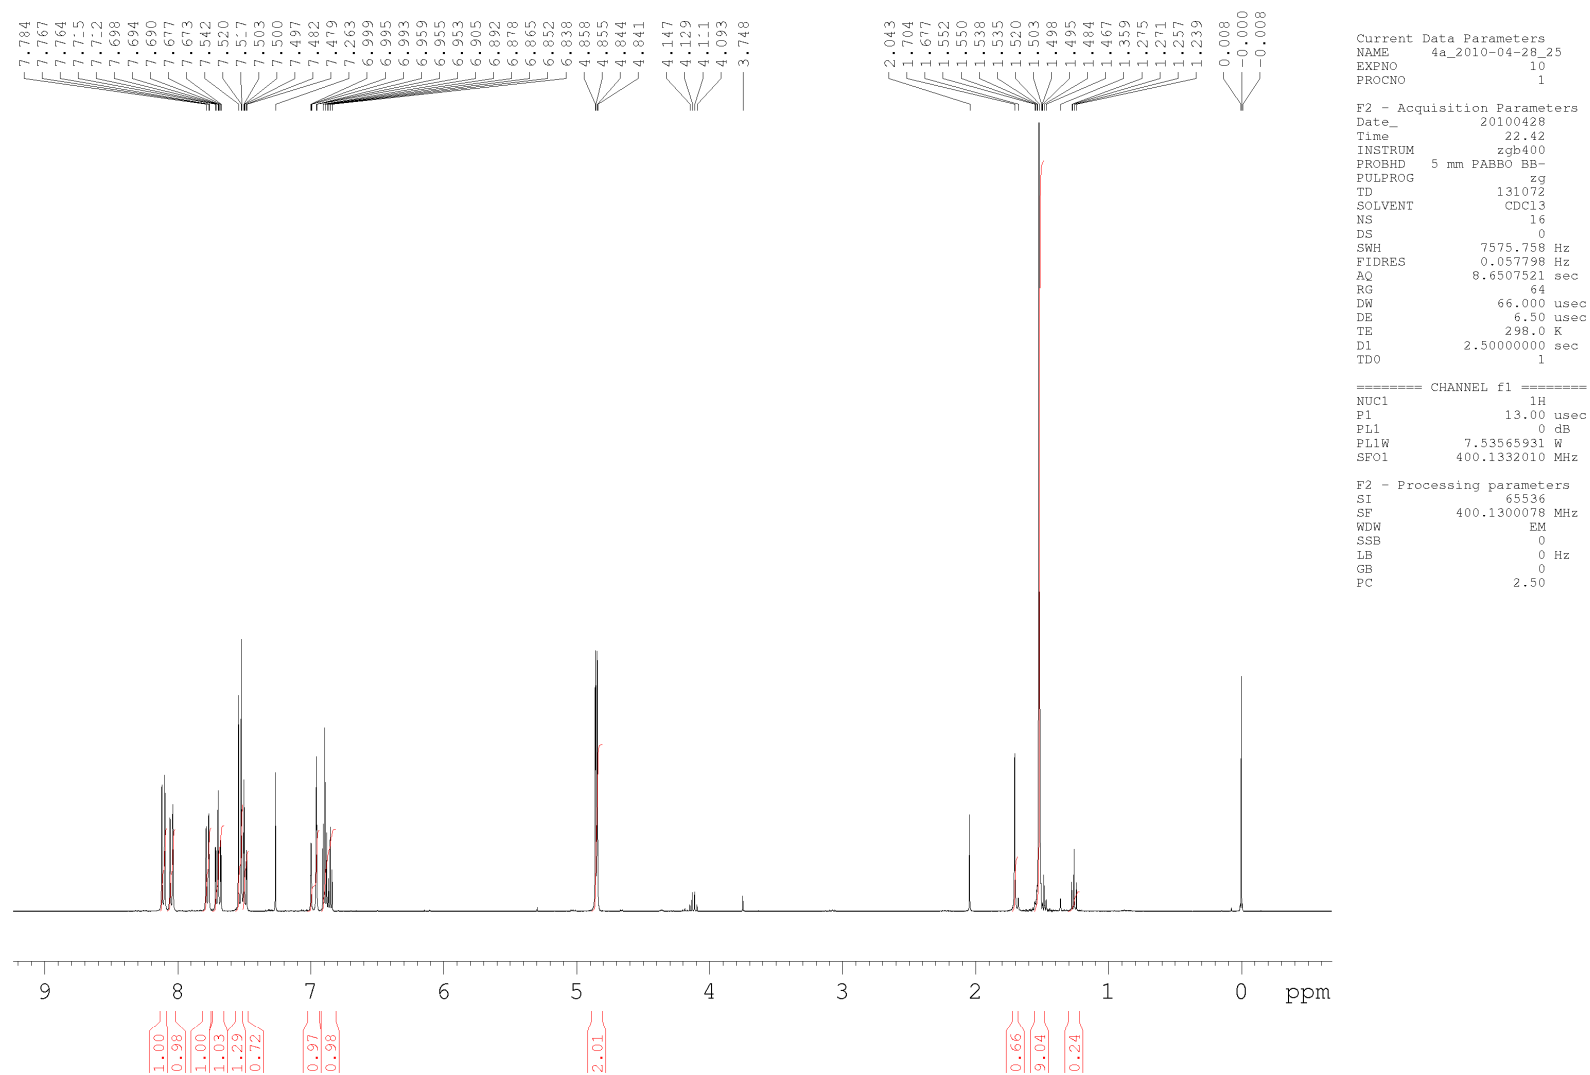

**Figure S3.**  $^1\text{H}$  spectrum of **8a** in  $\text{CDCl}_3$  at 25  $^\circ\text{C}$

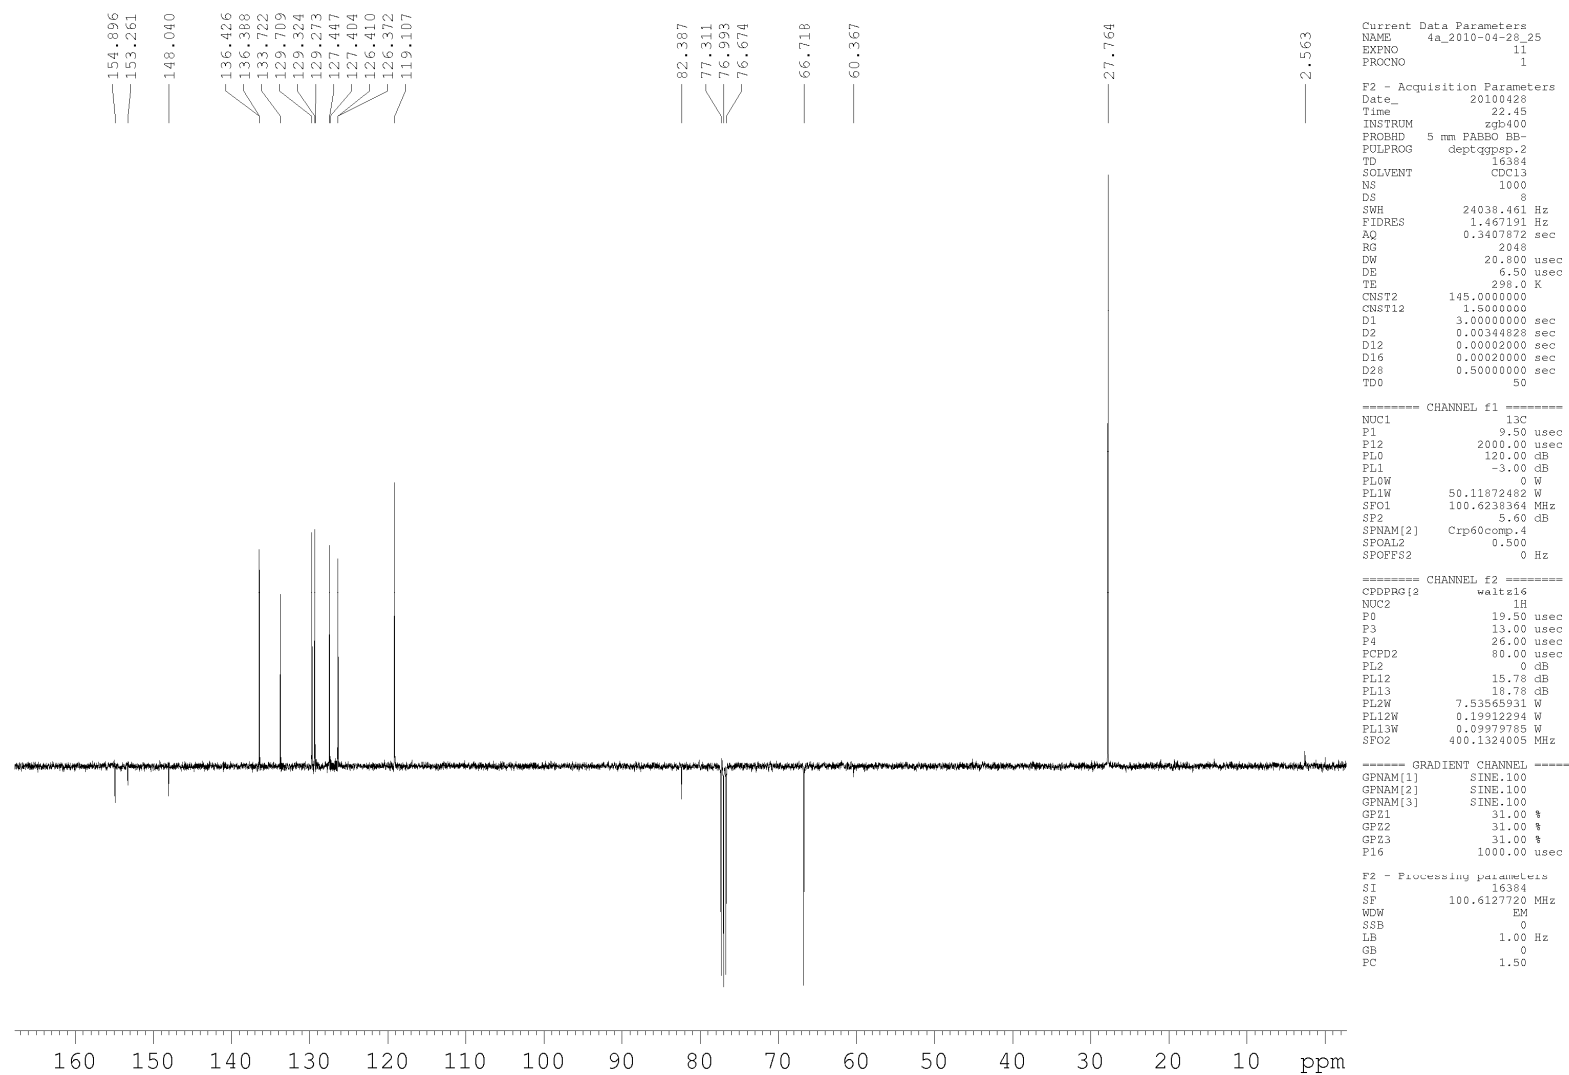

Figure S4.  $^{13}\text{C}$ -- DEPTq spectrum of **8a** in  $\text{CDCl}_3$  at 25  $^{\circ}\text{C}$

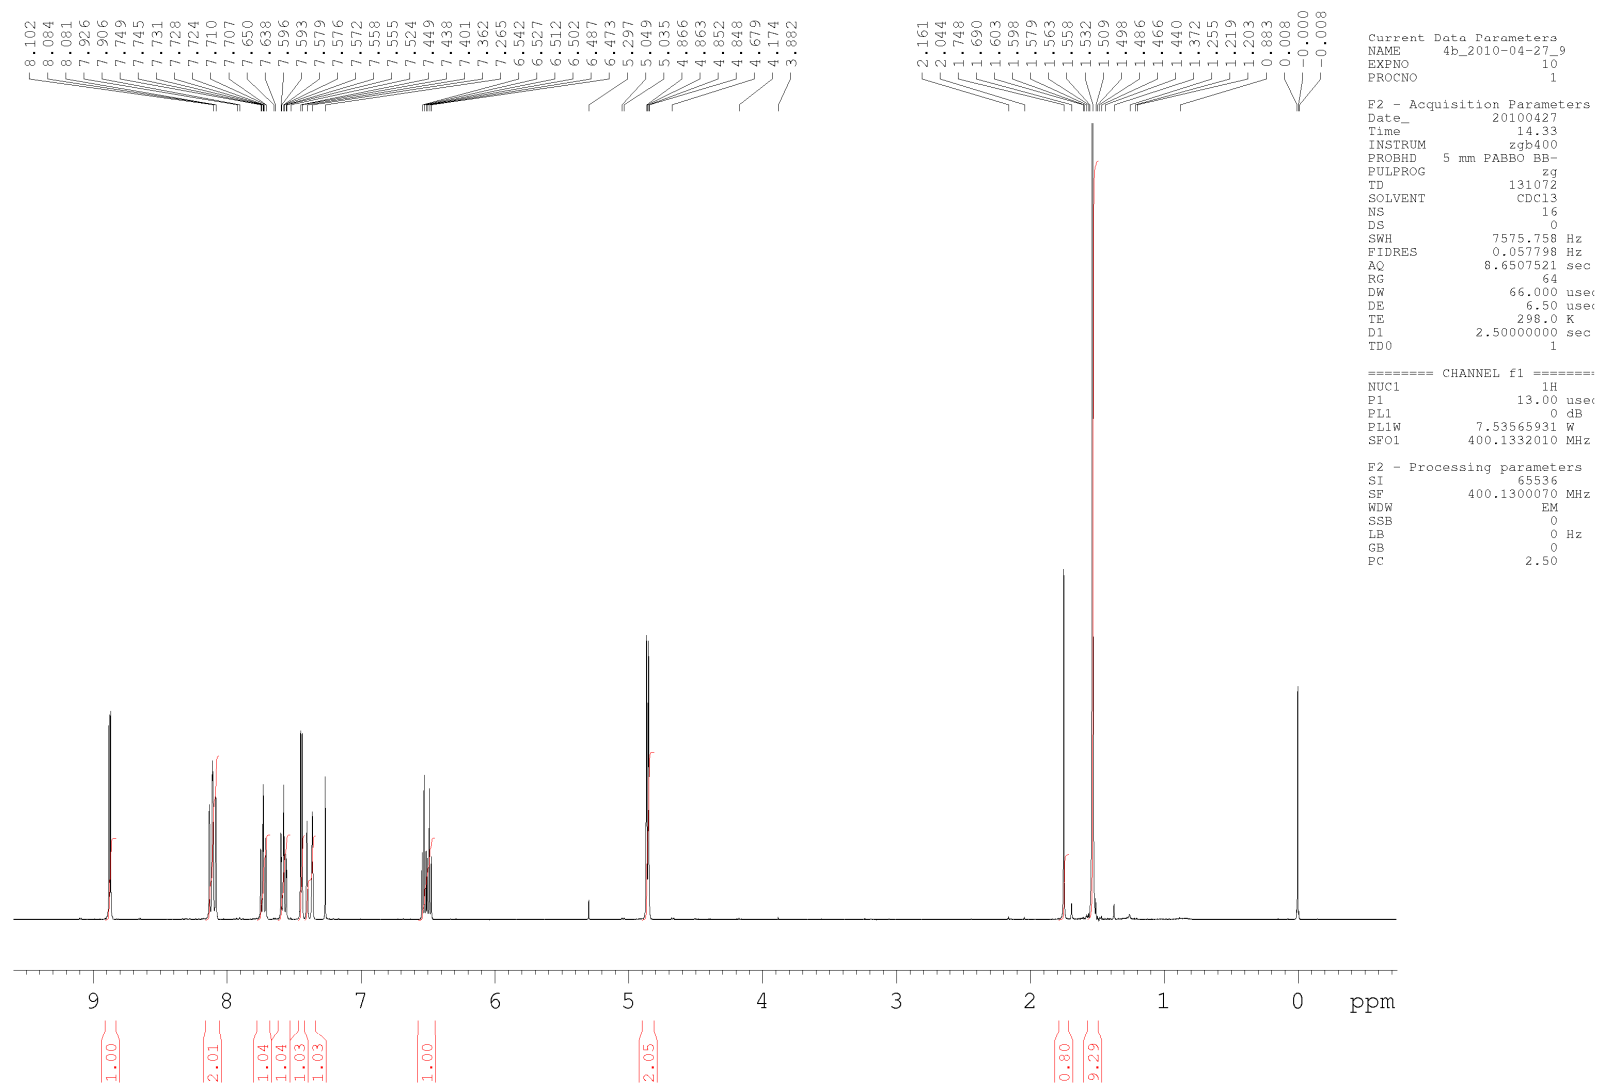

**Figure S5.**  $^1\text{H}$  spectrum of **8b** in  $\text{CDCl}_3$  at 25 °C

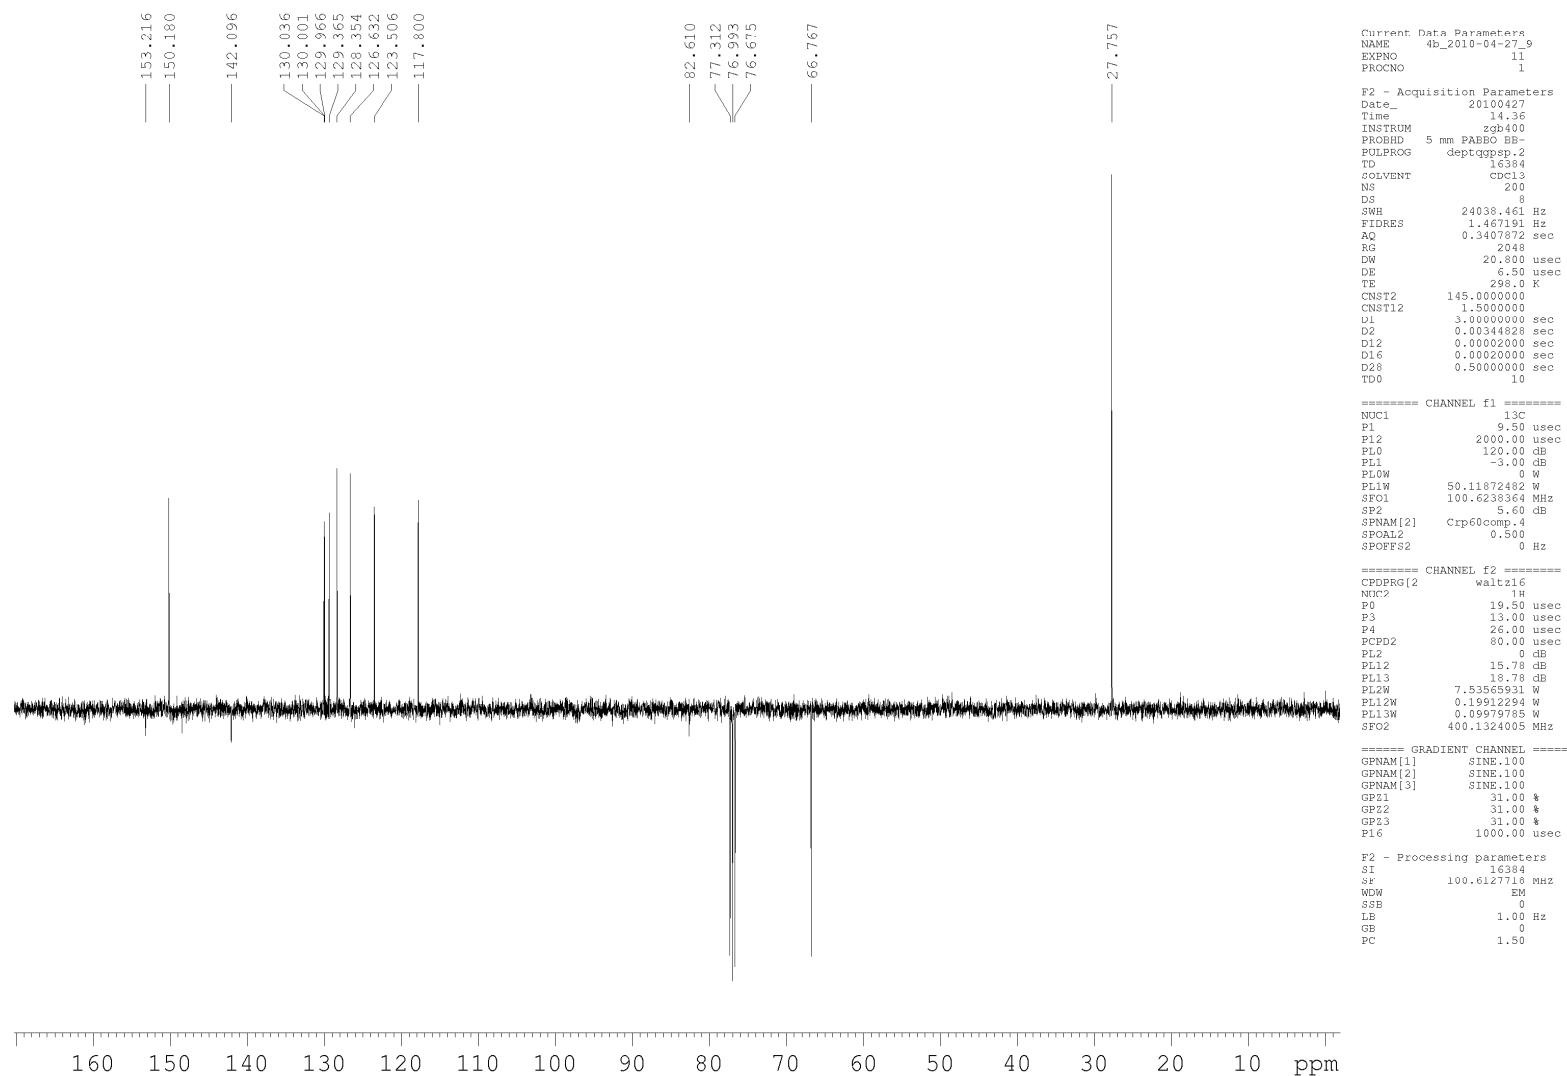

**Figure S6.**  $^{13}\text{C}$ -DEPTq spectrum of **8b** in  $\text{CDCl}_3$  at 25 °C

Solvent **CHLOROFORM-d**  
Pulse Sequence **zg30**  
Temperature (degree C) **24.000**  
Acquisition Time (sec) **2.4271**  
Number of Transients **8**  
Points Count **32768**  
Sweep Width (Hz) **9999.70**  
Spectrum Offset (Hz) **4493.9927**  
Original Points Count **24271**  
Nucleus **<sup>1</sup>H**  
Frequency (MHz) **500.1300**

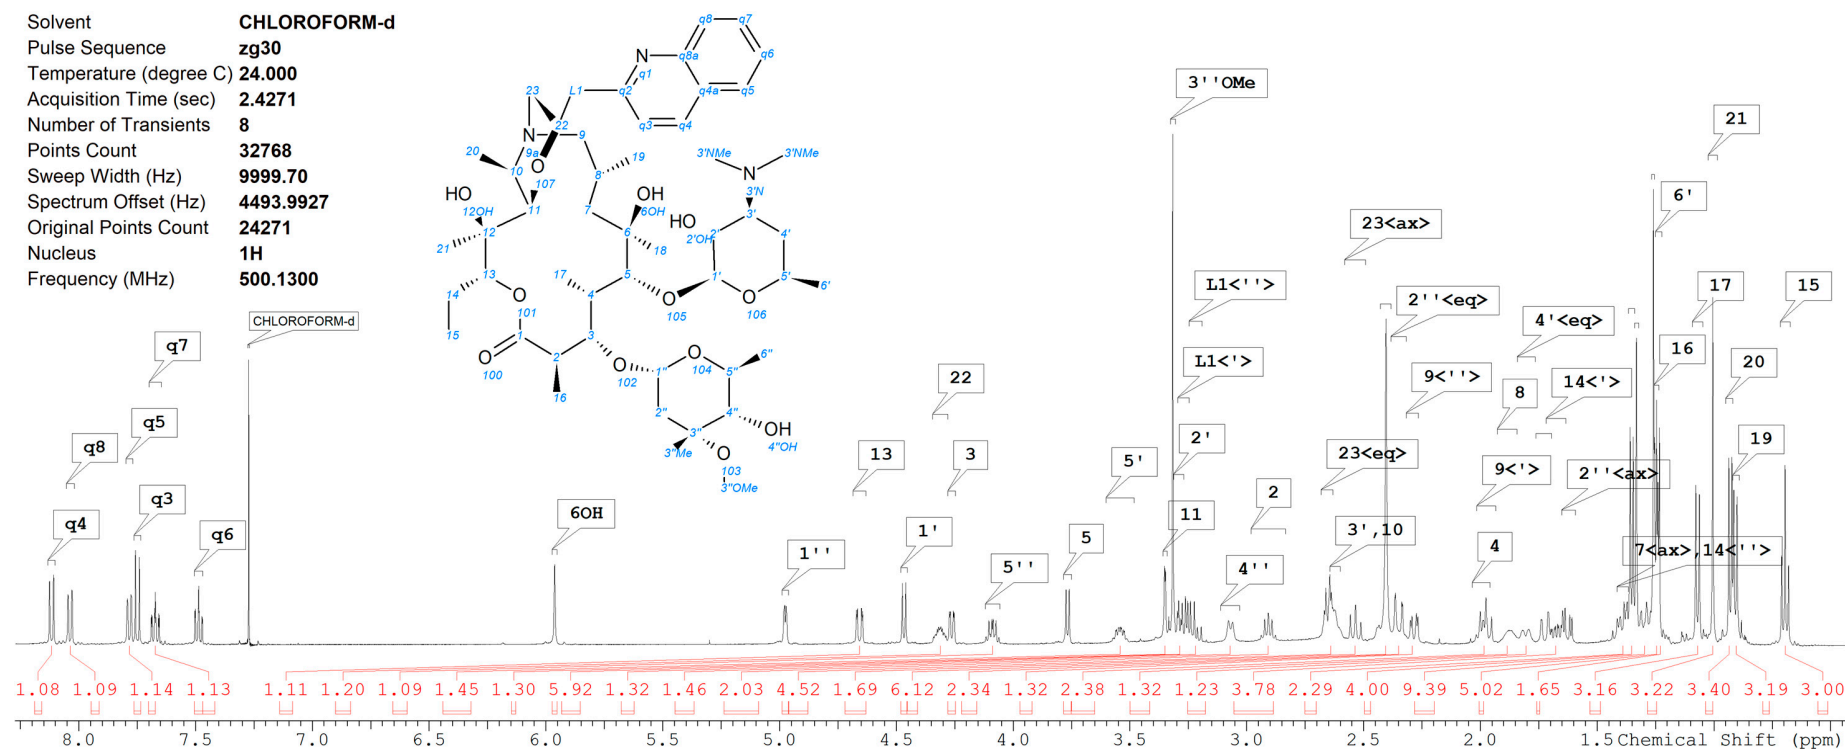

| Shift1 (ppm) | H's   | Type | J (Hz)         | Atom1        | Multiplet1 | Shift1 (ppm) | H's   | Type  | J (Hz)     | Atom1        | Multiplet1 | Shift1 (ppm) | H's   | Type    | J (Hz)              | Atom1 | Multiplet1 |
|--------------|-------|------|----------------|--------------|------------|--------------|-------|-------|------------|--------------|------------|--------------|-------|---------|---------------------|-------|------------|
| 0.696        | 3.000 | t    | 7.5            | 15           | M01        | 1.872        | 1.000 | m     | -          | 8            | M47        | 3.543        | 1.000 | dqd     | 10.2, 6.4, 2.1      | 5'    | M15        |
| 0.909        | 3.000 | d    | 7.0            | 19           | M02        | 1.977        | 1.000 | br t  | 12.1       | 9<'>         | M08        | 3.768        | 1.000 | d       | 7.0                 | 5     | M16        |
| 0.930        | 3.000 | d    | 6.4            | 20           | M38        | 1.988        | 1.000 | quind | 7.5, 1.8   | 4            | M48        | 4.089        | 1.000 | dq      | 8.8, 6.2            | 5"    | M17        |
| 1.006        | 3.000 | s    | -              | 21           | M03        | 2.284        | 1.000 | dd    | 12.5, 3.4  | 9<'>         | M09        | 4.264        | 1.000 | dd      | 8.7, 1.8            | 3     | M18        |
| 1.071        | 3.000 | d    | 7.3            | 17           | M04        | 2.350        | 1.000 | br dd | 14.6, 1.5  | 2"<eq>       | M36        | 4.315        | 1.000 | br dddd | 10.7, 8.2, 4.9, 2.9 | 22    | M29        |
| 1.240        | 3.000 | br d | 6.1            | 6'           | M05        | 2.404        | 6.000 | s     | -          | 3'NMe, 3'NMe | M35        | 4.468        | 1.000 | d       | 7.3                 | 1'    | M19        |
| 1.248        | 3.000 | br d | 7.3            | 16           | M39        | 2.535        | 1.000 | dd    | 11.6, 10.7 | 23<ax>       | M10        | 4.659        | 1.000 | dd      | 11.1, 2.0           | 13    | M20        |
| 1.260        | 3.000 | s    | -              | 3"Me         | M40        | 2.624        | 2.000 | m     | -          | 3', 10       | M11        | 4.976        | 1.000 | dd      | 4.6, 1.4            | 1"    | M21        |
| 1.301        | 1.000 | td   | 11.3, 10.2     | 4'<ax>       | M43        | 2.654        | 1.000 | dd    | 11.6, 3.1  | 23<eq>       | M34        | 5.964        | 1.000 | s       | -                   | 6OH   | M22        |
| 1.333        | 3.000 | s    | -              | 18           | M06        | 2.909        | 1.000 | dq    | 8.7, 7.2   | 2            | M12        | 7.487        | 1.000 | ddd     | 8.1, 7.0, 1.1       | q6    | M23        |
| 1.353        | 3.000 | d    | 6.1            | 6"           | M41        | 3.070        | 1.000 | br d  | 8.5        | 4"           | M13        | 7.673        | 1.000 | ddd     | 8.4, 6.9, 1.5       | q7    | M24        |
| 1.389        | 2.000 | m    | -              | 7<ax>, 14<'> | M42        | 3.219        | 1.000 | dd    | 15.0, 8.2  | L1<'>        | M14        | 7.750        | 1.000 | d       | 8.5                 | q3    | M25        |
| 1.628        | 1.000 | dd   | 15.0, 4.9      | 2"<ax>       | M07        | 3.273        | 1.000 | dd    | 14.0, 4.9  | L1<'>        | M31        | 7.784        | 1.000 | dd      | 8.2, 0.9            | q5    | M28        |
| 1.674        | 1.000 | dqd  | 14.4, 7.5, 1.8 | 14<'>        | M45        | 3.295        | 1.000 | dd    | 10.4, 7.6  | 2'           | M33        | 8.039        | 1.000 | d       | 8.2                 | q8    | M26        |
| 1.726        | 1.000 | d    | 14.6           | 7<eq>        | M37        | 3.317        | 3.000 | s     | -          | 3"OMe        | M32        | 8.117        | 1.000 | d       | 8.5                 | q4    | M27        |
| 1.807        | 1.000 | ddd  | 12.5, 4.0, 2.1 | 4'<eq>       | M44        | 3.351        | 1.000 | d     | 1.8        | 11           | M30        |              |       |         |                     |       |            |

**Figure S7.** <sup>1</sup>H spectrum, structure, numbering and assignment of **10a** in CDCl<sub>3</sub> at 25 °C

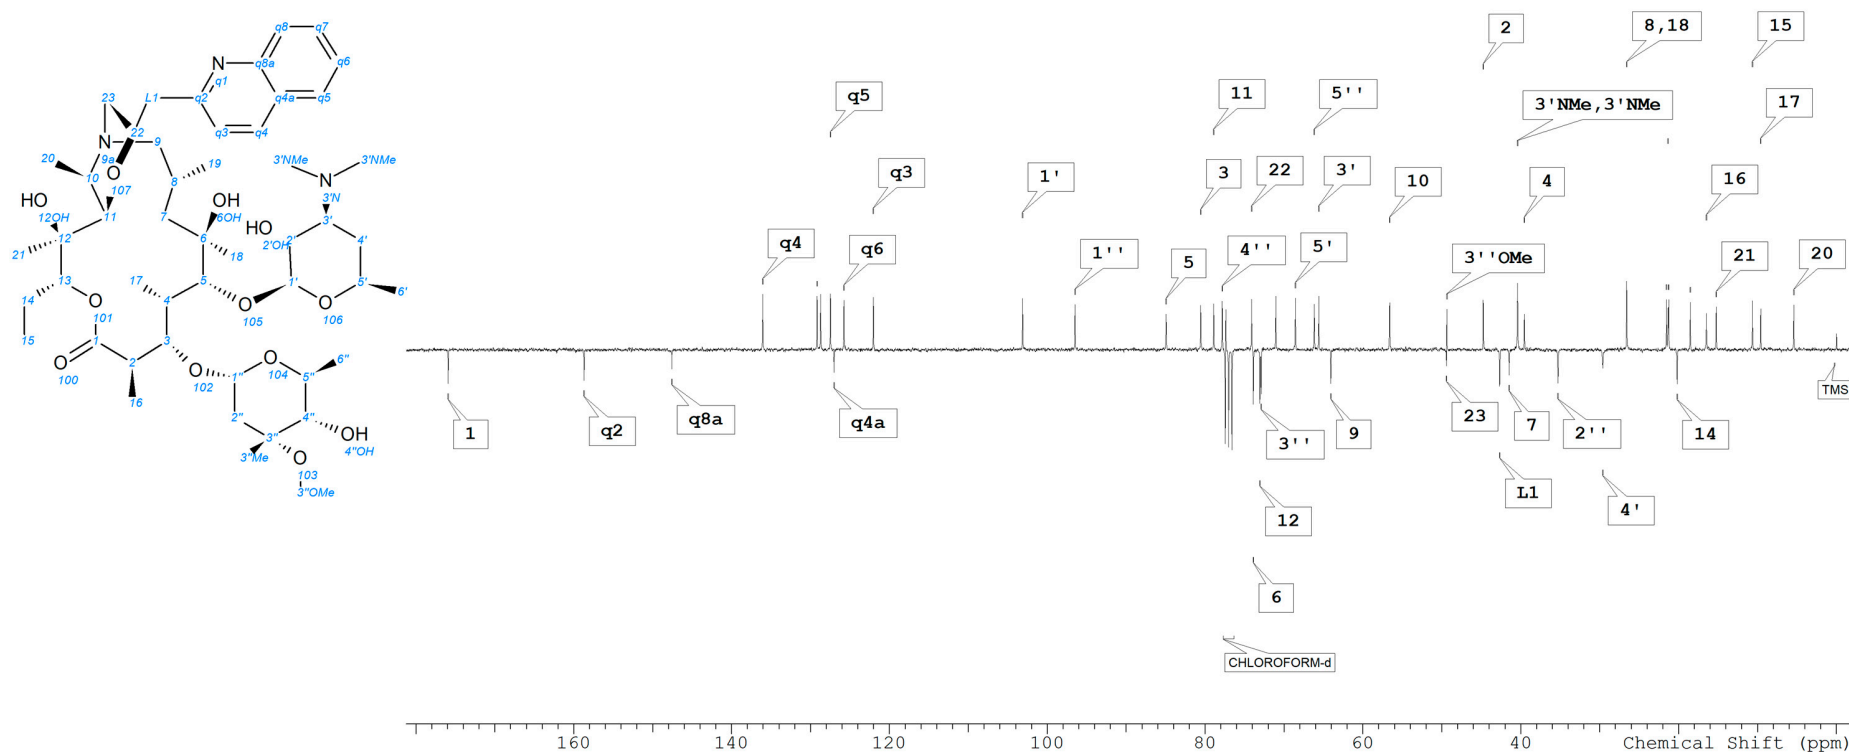

| Shift1 (ppm) | C's   | Type | Atom1        | Multiplet1 | Shift1 (ppm) | C's   | Type | Atom1 | Multiplet1 | Shift1 (ppm) | C's   | Type | Atom1 | Multiplet1 | Shift1 (ppm) | C's   | Type | Atom1 | Multiplet1 |
|--------------|-------|------|--------------|------------|--------------|-------|------|-------|------------|--------------|-------|------|-------|------------|--------------|-------|------|-------|------------|
| 5.421        | 1.000 | s    | 20           | M02        | 41.490       | 1.000 | s    | 7     | M17        | 77.392       | 1.000 | s    | 13    | M48        | 158.728      | 1.000 | s    | q2    | M46        |
| 9.607        | 1.000 | s    | 17           | M03        | 42.687       | 1.000 | s    | L1    | M18        | 77.844       | 1.000 | s    | 4"    | M32        | 175.934      | 1.000 | s    | 1     | M47        |
| 10.662       | 1.000 | s    | 15           | M04        | 44.773       | 1.000 | s    | 2     | M19        | 78.923       | 1.000 | s    | 11    | M33        |              |       |      |       |            |
| 15.253       | 1.000 | s    | 21           | M05        | 49.379       | 1.000 | s    | 3"OMe | M20        | 80.564       | 1.000 | s    | 3     | M34        |              |       |      |       |            |
| 16.498       | 1.000 | s    | 16           | M06        | 49.419       | 1.000 | s    | 23    | M21        | 84.949       | 1.000 | s    | 5     | M35        |              |       |      |       |            |
| 18.551       | 1.000 | s    | 6"           | M07        | 56.634       | 1.000 | s    | 10    | M22        | 96.501       | 1.000 | s    | 1"    | M36        |              |       |      |       |            |
| 20.201       | 1.000 | s    | 14           | M08        | 64.080       | 1.000 | s    | 9     | M23        | 103.146      | 1.000 | s    | 1'    | M37        |              |       |      |       |            |
| 21.279       | 1.000 | s    | 6'           | M09        | 65.618       | 1.000 | s    | 3'    | M24        | 122.057      | 1.000 | s    | q3    | M38        |              |       |      |       |            |
| 21.350       | 1.000 | s    | 19           | M10        | 66.189       | 1.000 | s    | 5"    | M25        | 125.783      | 1.000 | s    | q6    | M39        |              |       |      |       |            |
| 21.548       | 1.000 | s    | 3"Me         | M11        | 68.583       | 1.000 | s    | 5'    | M26        | 127.036      | 1.000 | s    | q4a   | M40        |              |       |      |       |            |
| 26.591       | 2.000 | s    | 8, 18        | M12        | 71.065       | 1.000 | s    | 2'    | M27        | 127.496      | 1.000 | s    | q5    | M41        |              |       |      |       |            |
| 29.636       | 1.000 | s    | 4'           | M13        | 72.920       | 1.000 | s    | 3"    | M28        | 128.733      | 1.000 | s    | q8    | M42        |              |       |      |       |            |
| 35.313       | 1.000 | s    | 2"           | M14        | 73.079       | 1.000 | s    | 12    | M29        | 129.193      | 1.000 | s    | q7    | M43        |              |       |      |       |            |
| 39.563       | 1.000 | s    | 4            | M15        | 73.904       | 1.000 | s    | 6     | M30        | 136.075      | 1.000 | s    | q4    | M44        |              |       |      |       |            |
| 40.427       | 2.000 | s    | 3'NMe, 3'NMe | M16        | 74.118       | 1.000 | s    | 22    | M31        | 147.596      | 1.000 | s    | q8a   | M45        |              |       |      |       |            |

Solvent **CHLOROFORM-d**

Pulse Sequence **jmod**

Temperature (degree C) **26.160**

Acquisition Time (sec) **1.6712**

Number of Transients **2425**

Points Count **32768**

Sweep Width (Hz) **19607.25**

Spectrum Offset (Hz) **9027.3271**

Original Points Count **32768**

Nucleus  **$^{13}\text{C}$**

Frequency (MHz) **75.4678**

**Figure S8.**  $^{13}\text{C}$ -DEPTq spectrum, structure, numbering and assignment of **10a** in  $\text{CDCl}_3$  at 25 °C

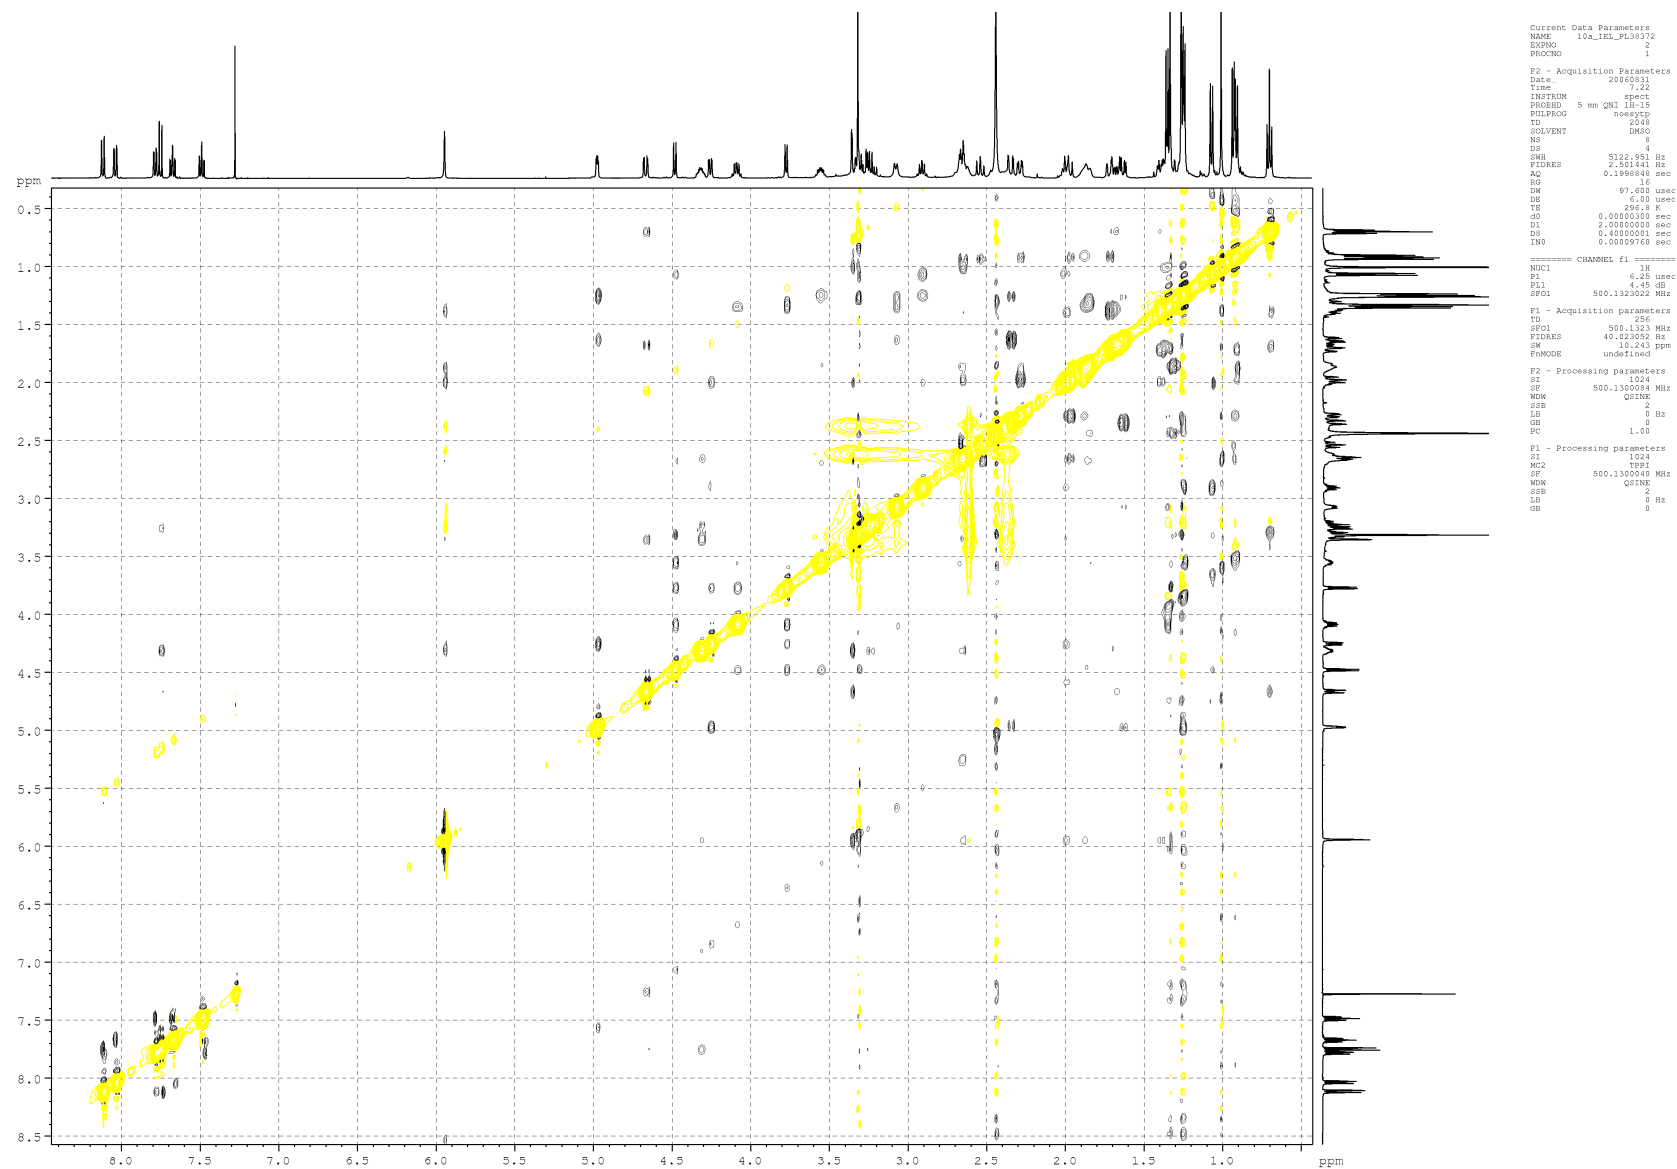

**Figure S9.** NOESY spectrum of **10a** in  $\text{CDCl}_3$  at 25 °C

|                        |                     |
|------------------------|---------------------|
| Solvent                | <b>CHLOROFORM-d</b> |
| Pulse Sequence         | <b>zg30</b>         |
| Temperature (degree C) | <b>25.400</b>       |
| Acquisition Time (sec) | <b>2.4271</b>       |
| Number of Transients   | <b>16</b>           |
| Points Count           | <b>32768</b>        |
| Sweep Width (Hz)       | <b>9999.70</b>      |
| Spectrum Offset (Hz)   | <b>4492.9575</b>    |
| Original Points Count  | <b>24271</b>        |
| Nucleus                | <b>1H</b>           |
| Frequency (MHz)        | <b>500.1300</b>     |

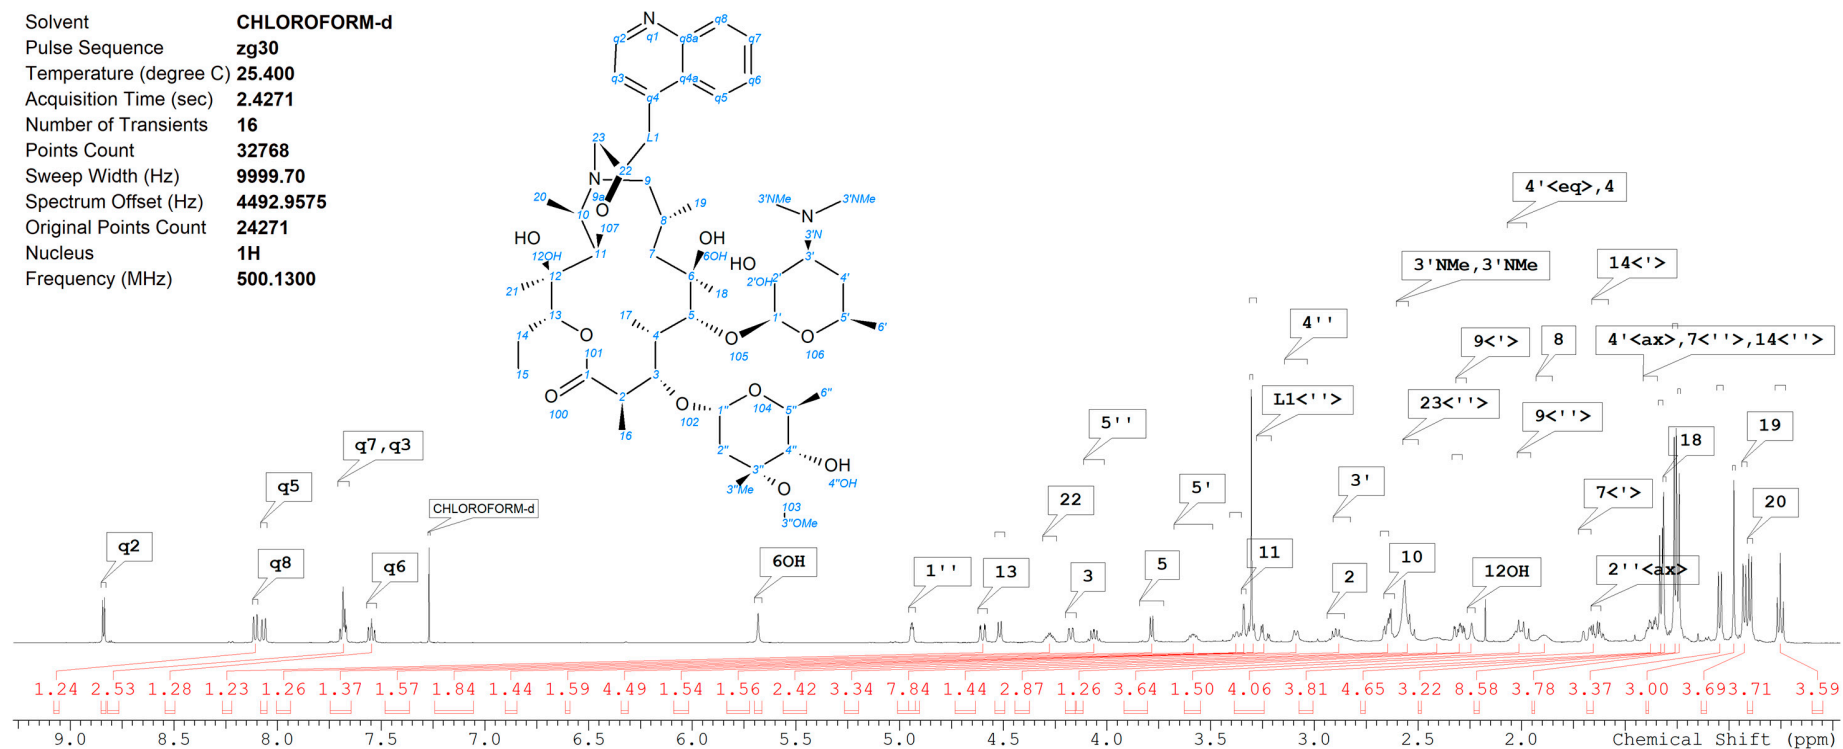

| Shift1 (ppm) | H's   | Type  | J (Hz)         | Atom1               | Multiplet1 | Shift1 (ppm) | H's   | Type  | J (Hz)    | Atom1        | Multiplet1 | Shift1 (ppm) | H's   | Type | J (Hz)         | Atom1  | Multiplet1 |
|--------------|-------|-------|----------------|---------------------|------------|--------------|-------|-------|-----------|--------------|------------|--------------|-------|------|----------------|--------|------------|
| 0.753        | 3.000 | t     | 7.3            | 15                  | M01        | 2.242        | 1.000 | br s  | -         | 12OH         | M13        | 3.585        | 1.000 | dqd  | 10.2, 6.1, 2.0 | 5'     | M20        |
| 0.899        | 3.000 | br d  | 6.4            | 20                  | M02        | 2.292        | 1.000 | br dd | 12.4, 3.5 | 9<'>         | M42        | 3.786        | 1.000 | d    | 6.1            | 5      | M21        |
| 0.927        | 3.000 | br d  | 7.0            | 19                  | M34        | 2.310        | 1.000 | br dd | 14.6, 2.4 | 2"<eq>       | M12        | 4.064        | 1.000 | dq   | 8.8, 6.4       | 5"     | M22        |
| 0.978        | 3.000 | s     | -              | 21                  | M03        | 2.410        | 1.000 | m     | -         |              | M14        | 4.175        | 1.000 | dd   | 9.0, 1.7       | 3      | M23        |
| 1.045        | 3.000 | d     | 7.3            | 17                  | M04        | 2.542        | 1.000 | t     | 11.6      | 23<'>        | M40        | 4.278        | 1.000 | ddt  | 10.8, 7.2, 3.7 | 22     | M24        |
| 1.241        | 3.000 | s     | -              | 3"Me                | M06        | 2.565        | 6.000 | br s  | -         | 3'NMe, 3"NMe | M41        | 4.518        | 1.000 | d    | 7.3            | 1'     | M25        |
| 1.260        | 6.000 | d     | 5.2            | 16, 6'              | M47        | 2.644        | 1.000 | br s  | -         | 10           | M16        | 4.601        | 1.000 | dd   | 11.1, 2.0      | 13     | M26        |
| 1.316        | 3.000 | s     | -              | 18                  | M08        | 2.656        | 1.000 | dd    | 8.5, 3.1  | 23<'>        | M15        | 4.941        | 1.000 | dd   | 4.3, 2.4       | 1"     | M27        |
| 1.329        | 3.000 | d     | 6.4            | 6"                  | M46        | 2.842        | 1.000 | br s  | -         | 3'           | M17        | 5.683        | 1.000 | s    | -              | 6OH    | M28        |
| 1.373        | 3.000 | m     | -              | 4'<ax>, 7<'>, 14<'> | M07        | 2.897        | 1.000 | dq    | 9.2, 7.3  | 2            | M39        | 7.548        | 1.000 | ddd  | 8.2, 7.0, 1.2  | q6     | M29        |
| 1.630        | 1.000 | dqd   | 14.4, 7.3, 1.8 | 14<'>               | M45        | 3.089        | 1.000 | br d  | 7.9       | 4"           | M18        | 7.682        | 2.000 | m    | -              | q7, q3 | M30        |
| 1.645        | 1.000 | dd    | 14.8, 4.7      | 2"<ax>              | M44        | 3.237        | 1.000 | dd    | 15.6, 4.0 | L1<'>        | M19        | 8.068        | 1.000 | d    | 8.2            | q5     | M31        |
| 1.688        | 1.000 | br dd | 14.8, 1.1      | 7<'>                | M09        | 3.304        | 3.000 | s     | -         | 3"OMe        | M38        | 8.109        | 1.000 | d    | 7.6            | q8     | M32        |
| 1.891        | 1.000 | m     | -              | 8                   | M10        | 3.305        | 1.000 | d     | 15.0      | L1<'>        | M37        | 8.840        | 1.000 | d    | 4.6            | q2     | M33        |
| 1.991        | 1.000 | t     | 12.5           | 9<'>                | M11        | 3.341        | 1.000 | d     | 1.8       | 11           | M36        |              |       |      |                |        |            |
| 2.026        | 2.000 | m     | -              | 4'<eq>, 4           | M43        | 3.375        | 1.000 | br dd | 9.9, 7.5  | 2'           | M35        |              |       |      |                |        |            |

**Figure S10.**  $^1\text{H}$  spectrum, structure, numbering and assignment of **10b** in  $\text{CDCl}_3$  at 25 °C

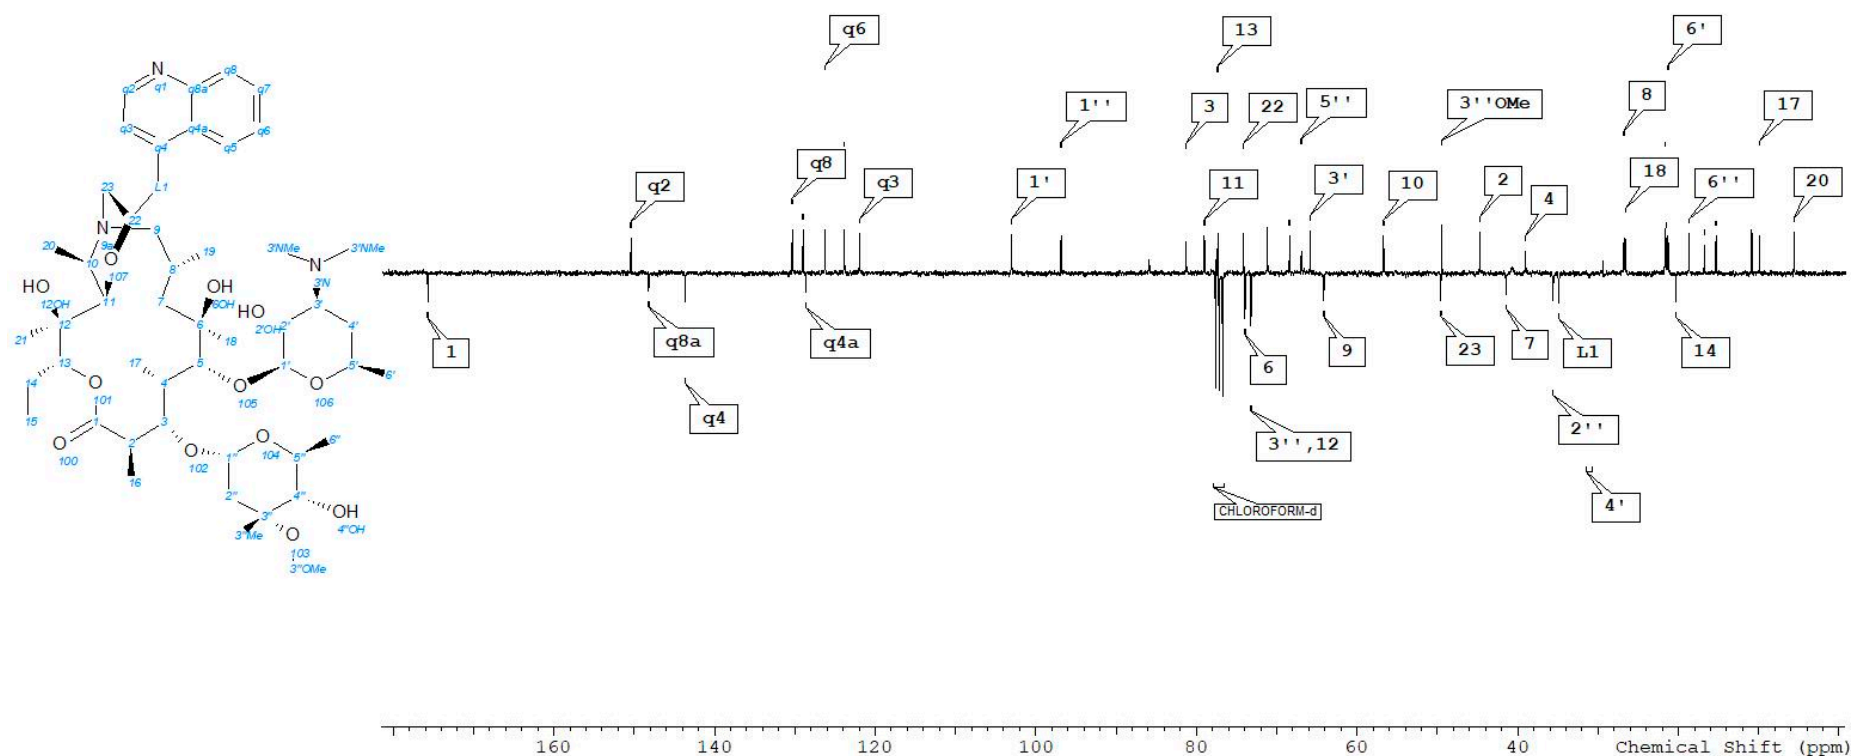

| Shift1 (ppm) | C's   | Type | Atom1 | Multiplet1 | Shift1 (ppm) | C's   | Type | Atom1        | Multiplet1 | Shift1 (ppm) | C's   | Type | Atom1 | Multiplet1 | Shift1 (ppm) | C's   | Type | Atom1 | Multiplet1 |
|--------------|-------|------|-------|------------|--------------|-------|------|--------------|------------|--------------|-------|------|-------|------------|--------------|-------|------|-------|------------|
| 5.576        | 1.000 | s    | 20    | M01        | 39.013       | 1.000 | s    | 4            | M16        | 74.106       | 1.000 | s    | 22    | M32        | 150.383      | 1.000 | s    | q2    | M46        |
| 9.905        | 1.000 | s    | 17    | M02        | 40.722       | 2.000 | s    | 3'NMe, 3'NMe | M18        | 77.333       | 1.000 | s    | 13    | M48        | 175.677      | 1.000 | s    | 1     | M47        |
| 10.873       | 1.000 | s    | 15    | M03        | 41.439       | 1.000 | s    | 7            | M19        | 79.030       | 1.000 | s    | 11    | M33        |              |       |      |       |            |
| 15.289       | 1.000 | s    | 21    | M04        | 44.714       | 1.000 | s    | 2            | M20        | 81.258       | 1.000 | s    | 3     | M34        |              |       |      |       |            |
| 16.764       | 1.000 | s    | 16    | M05        | 49.439       | 1.000 | s    | 3''OMe       | M21        | 85.873       | 1.000 | s    |       | M35        |              |       |      |       |            |
| 18.651       | 1.000 | s    | 6''   | M06        | 49.574       | 1.000 | s    | 23           | M22        | 96.823       | 1.000 | s    | 1''   | M36        |              |       |      |       |            |
| 20.300       | 1.000 | s    | 14    | M07        | 56.694       | 1.000 | s    | 10           | M23        | 103.023      | 1.000 | s    | 1'    | M37        |              |       |      |       |            |
| 21.252       | 1.000 | s    | 6'    | M08        | 64.132       | 1.000 | s    | 9            | M24        | 121.974      | 1.000 | s    | q3    | M38        |              |       |      |       |            |
| 21.482       | 1.000 | s    | 19    | M09        | 65.836       | 1.000 | s    | 3'           | M25        | 123.837      | 1.000 | s    | q5    | M39        |              |       |      |       |            |
| 21.648       | 1.000 | s    | 3''Me | M10        | 66.899       | 1.000 | s    | 5''          | M26        | 126.240      | 1.000 | s    | q6    | M40        |              |       |      |       |            |
| 26.572       | 1.000 | s    | 18    | M11        | 68.413       | 1.000 | s    | 5'           | M27        | 128.642      | 1.000 | s    | q4a   | M41        |              |       |      |       |            |
| 26.762       | 1.000 | s    | 8     | M12        | 71.173       | 1.000 | s    | 2'           | M28        | 128.959      | 1.000 | s    | q7    | M42        |              |       |      |       |            |
| 31.145       | 1.000 | m    | 4'    | M13        | 73.209       | 1.000 | s    |              | M29        | 130.299      | 1.000 | s    | q8    | M43        |              |       |      |       |            |
| 34.890       | 1.000 | s    | L1    | M14        | 73.209       | 2.000 | s    | 3'', 12      | M30        | 143.668      | 1.000 | s    | q4    | M44        |              |       |      |       |            |
| 35.579       | 1.000 | s    | 2''   | M15        | 73.924       | 1.000 | s    | 6            | M31        | 148.179      | 1.000 | s    | q8a   | M45        |              |       |      |       |            |

Solvent **CHLOROFORM-d**  
 Pulse Sequence **jmod**  
 Temperature (degree C) **25.160**  
 Acquisition Time (sec) **1.6712**  
 Number of Transients **2068**  
 Points Count **32768**  
 Sweep Width (Hz) **19607.25**  
 Spectrum Offset (Hz) **9037.8359**  
 Original Points Count **32768**  
 Nucleus **13C**  
 Frequency (MHz) **75.4677**

**Figure S11.** <sup>13</sup>C- DEPTq spectrum, structure, numbering and assignment of **10b** in CDCl<sub>3</sub> at 25 °C

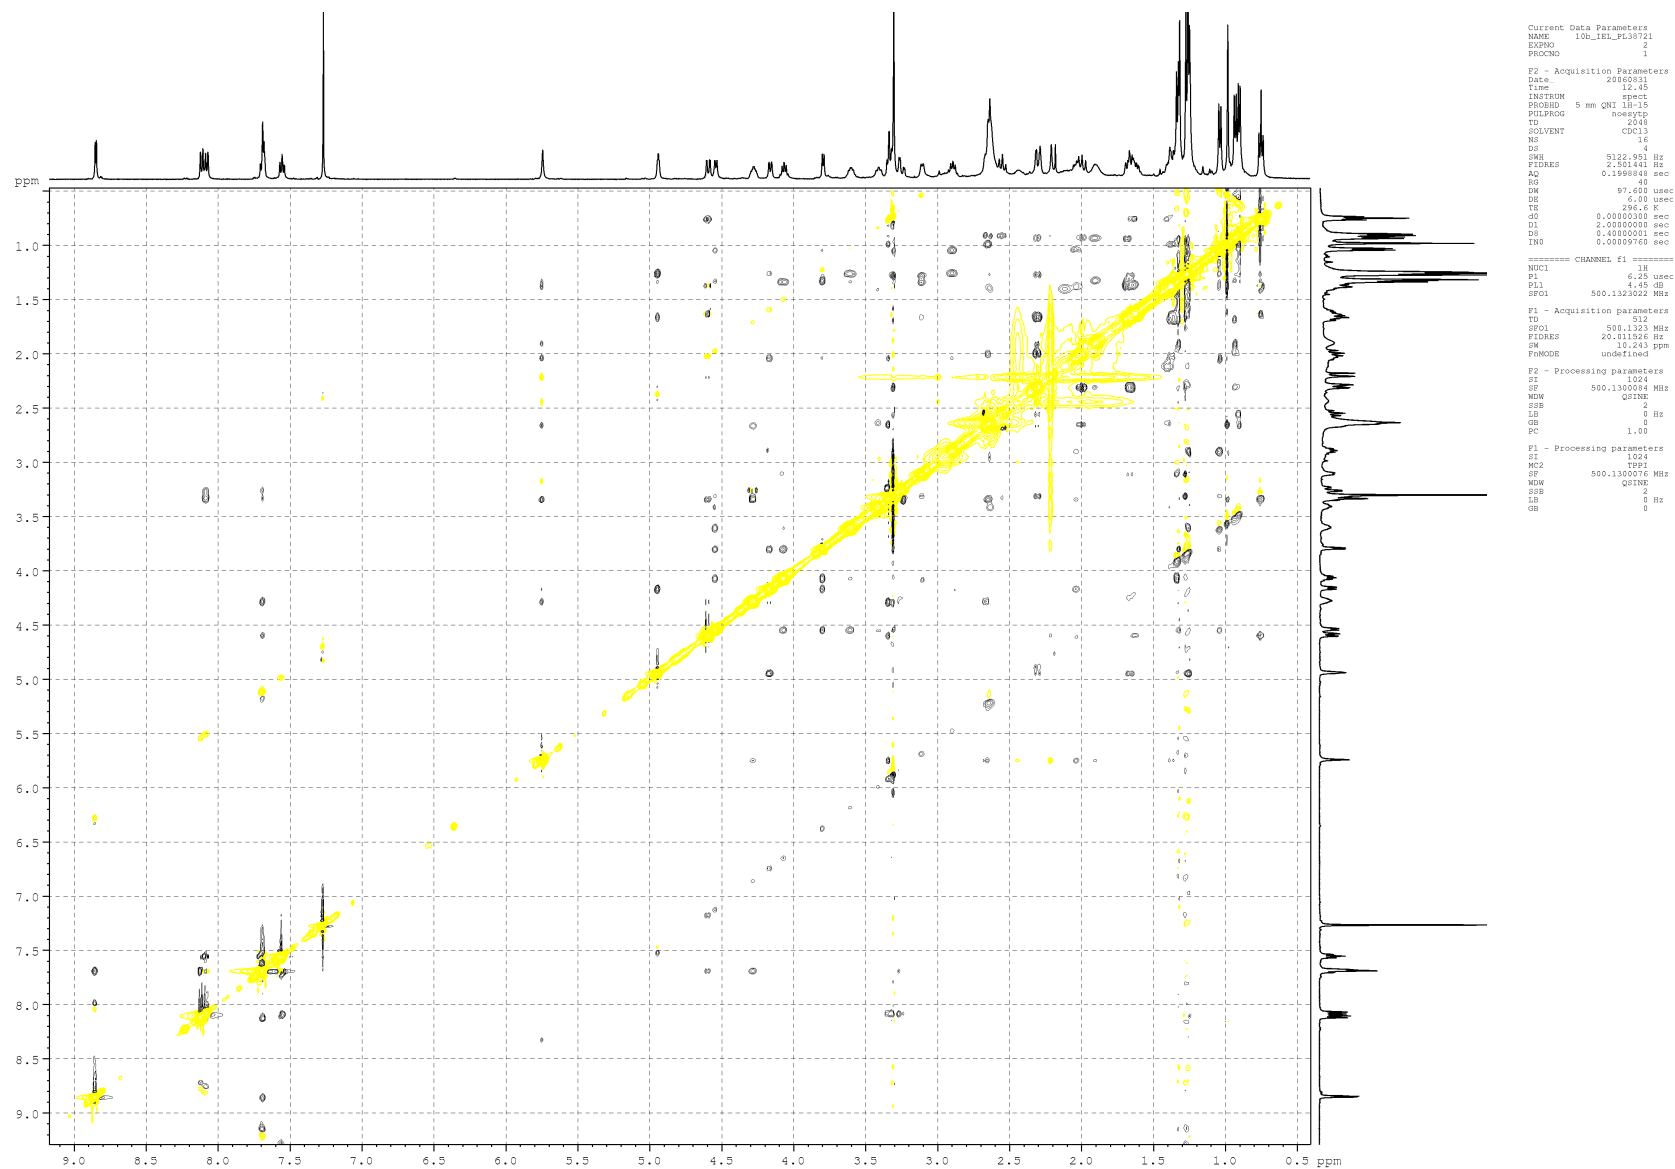

**Figure S12.** NOESY spectrum of **10b** in  $\text{CDCl}_3$  at 25 °C

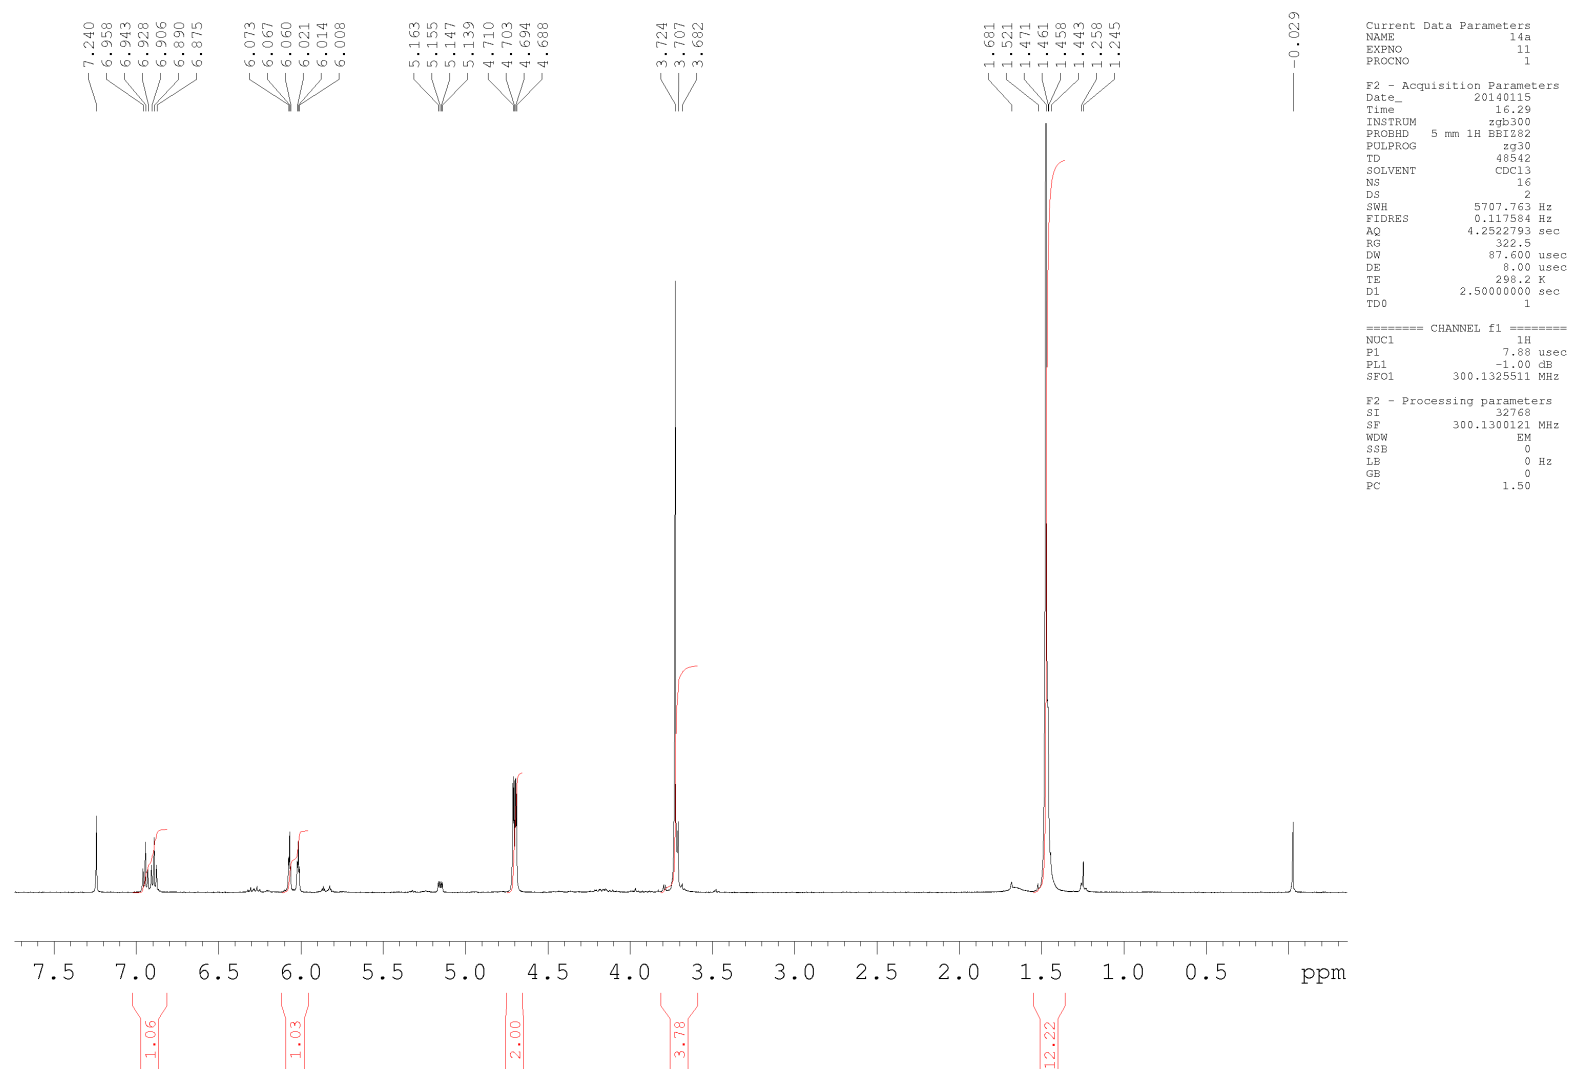

**Figure S13.**  $^1\text{H}$  spectrum of **14a** in  $\text{CDCl}_3$  at 25 °C

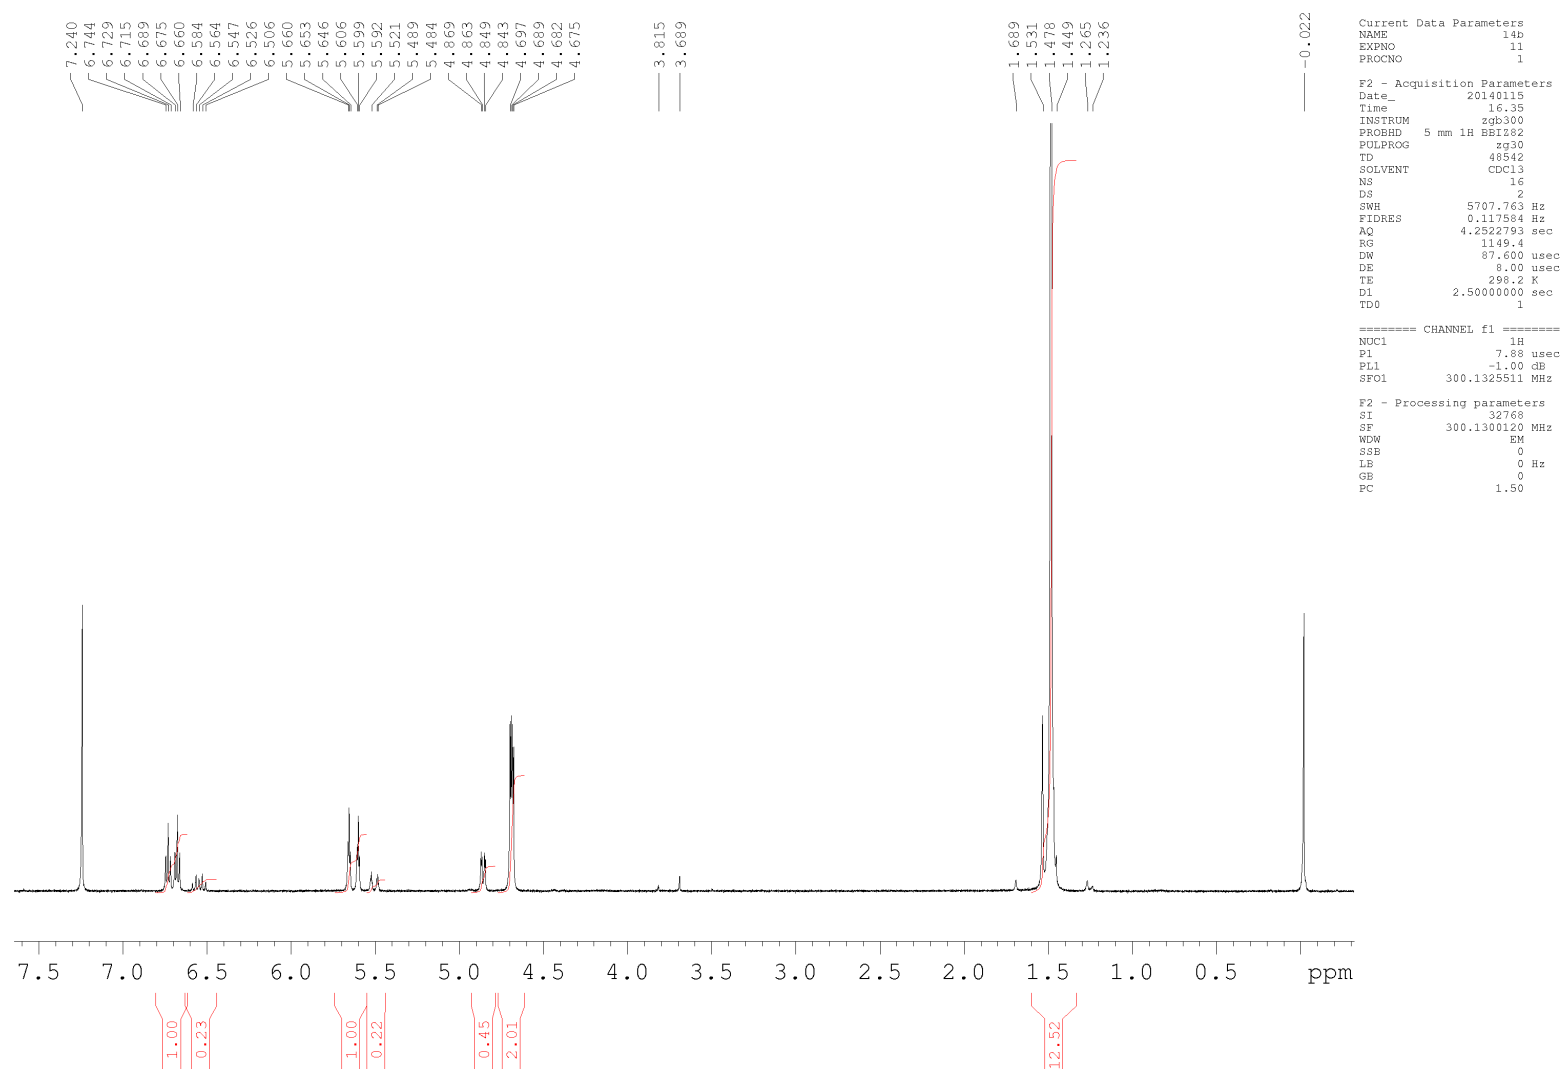

**Figure S14.**  $^1\text{H}$  spectrum of **14b** in  $\text{CDCl}_3$  at 25 °C

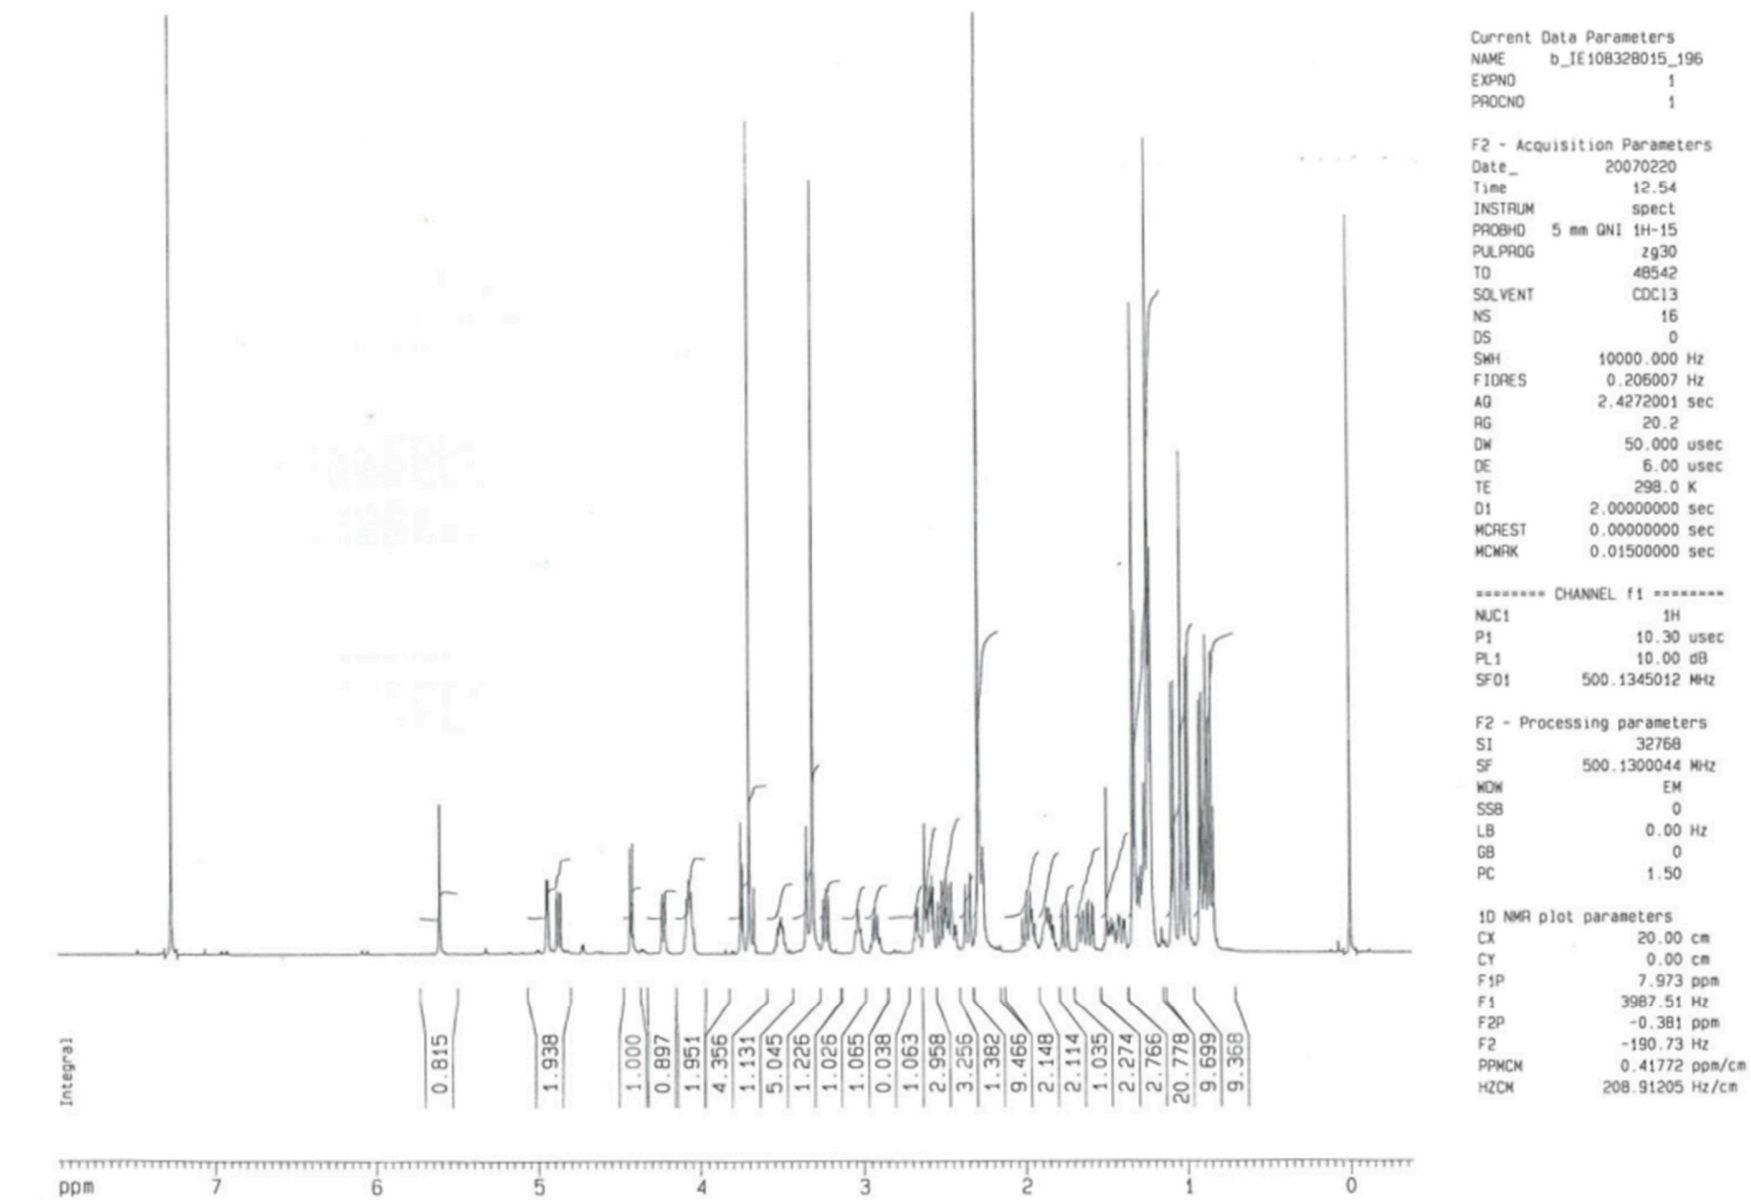

**Figure S15.**  $^1\text{H}$  spectrum of **15a** in  $\text{CDCl}_3$  at 25  $^\circ\text{C}$

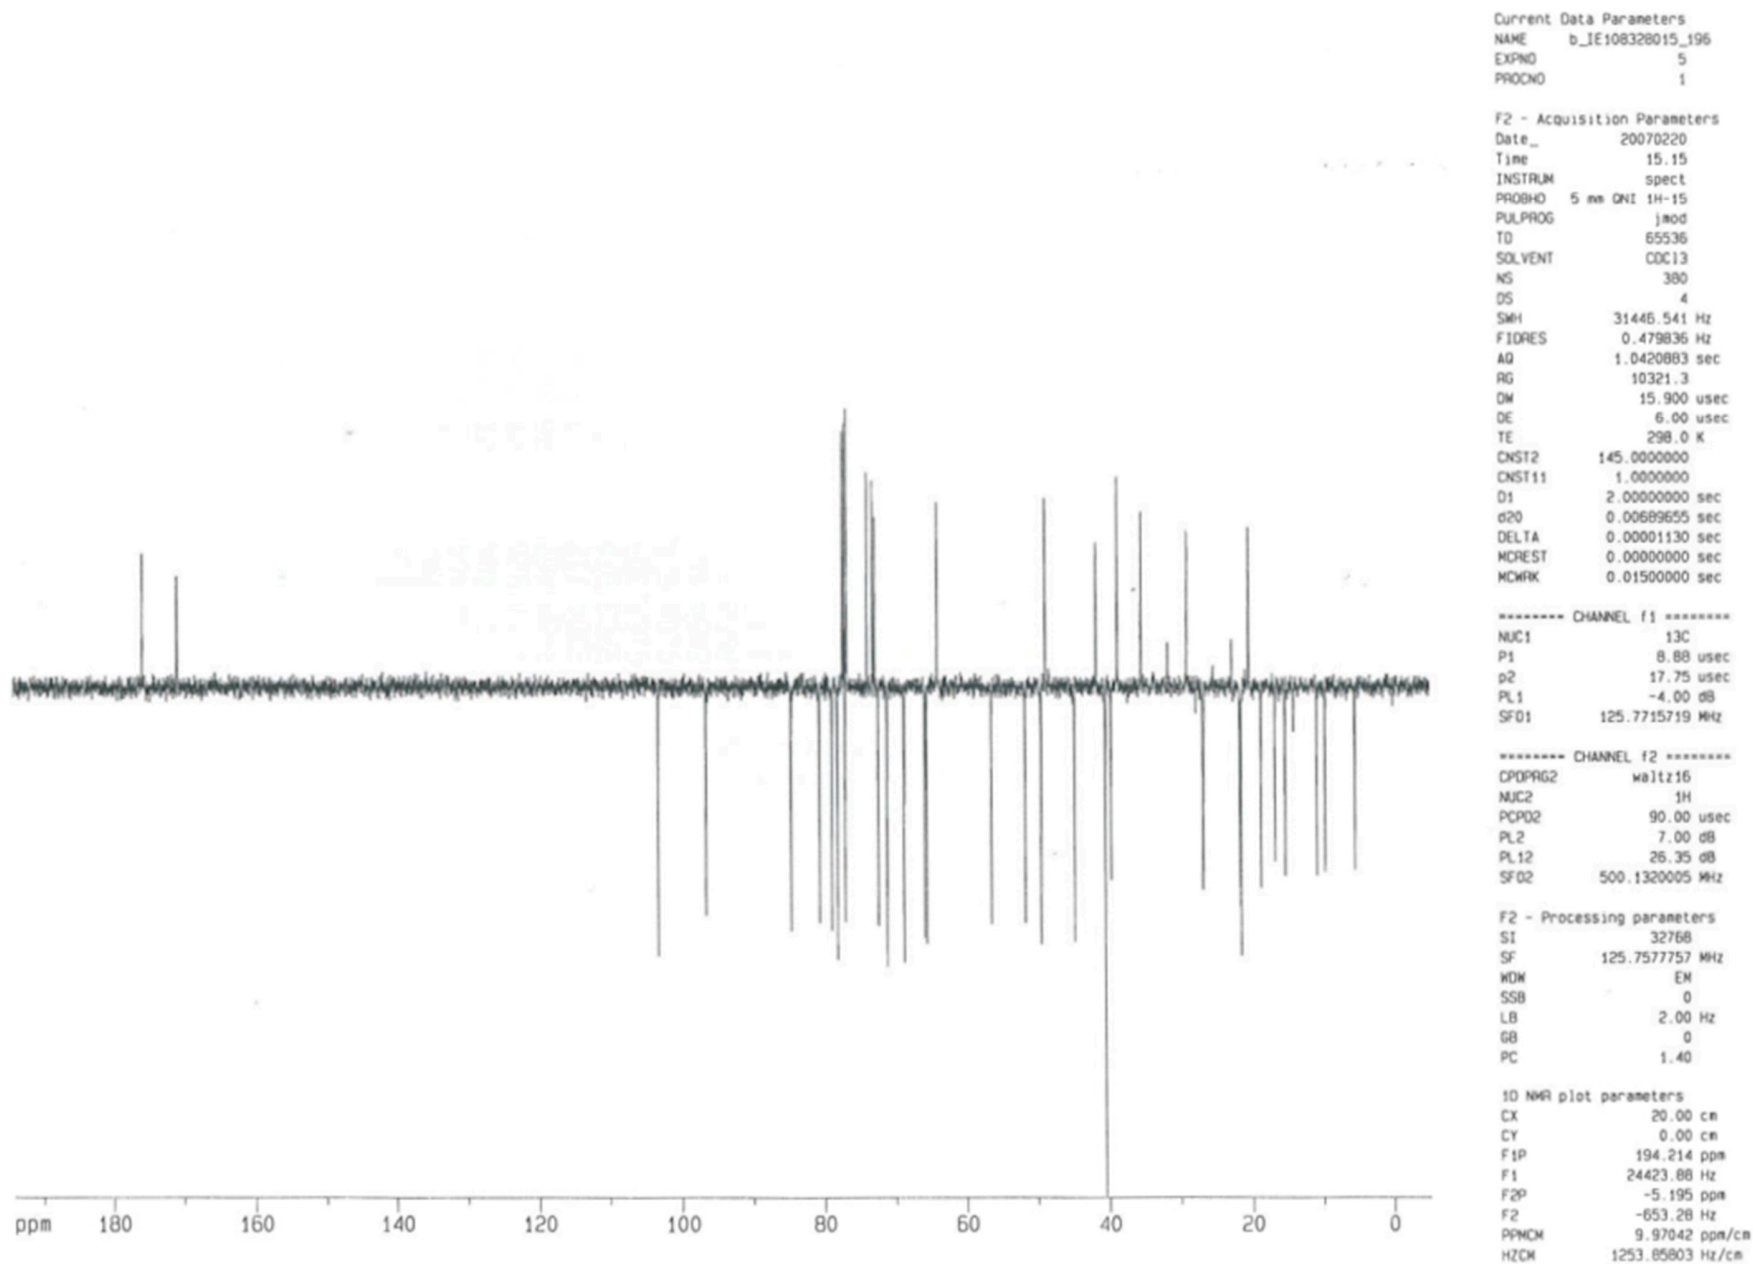

**Figure S16.**  $^{13}\text{C}$ -APT spectrum of **15a** in  $\text{CDCl}_3$  at 25 °C

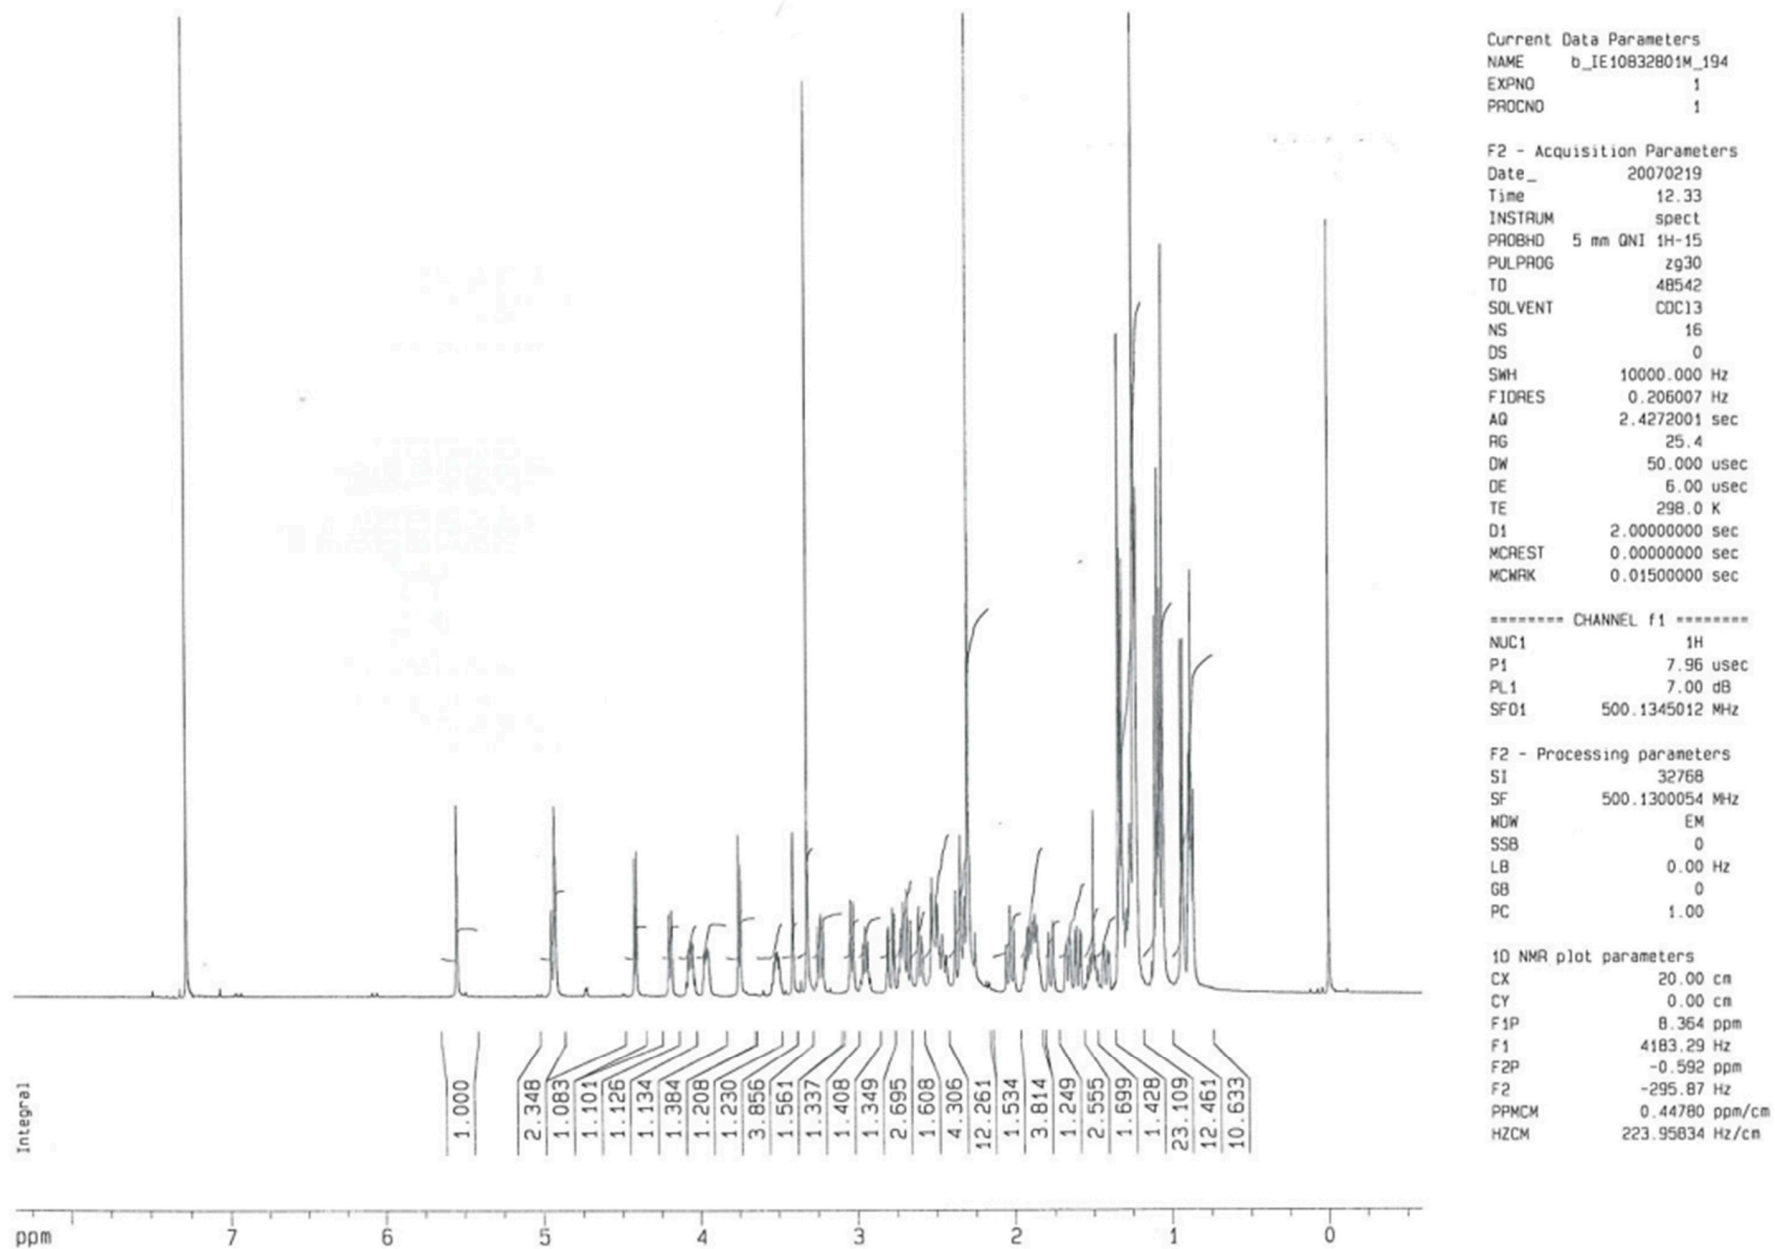

**Figure S17.**  $^1\text{H}$  spectrum of **15b** in  $\text{CDCl}_3$  at 25  $^\circ\text{C}$

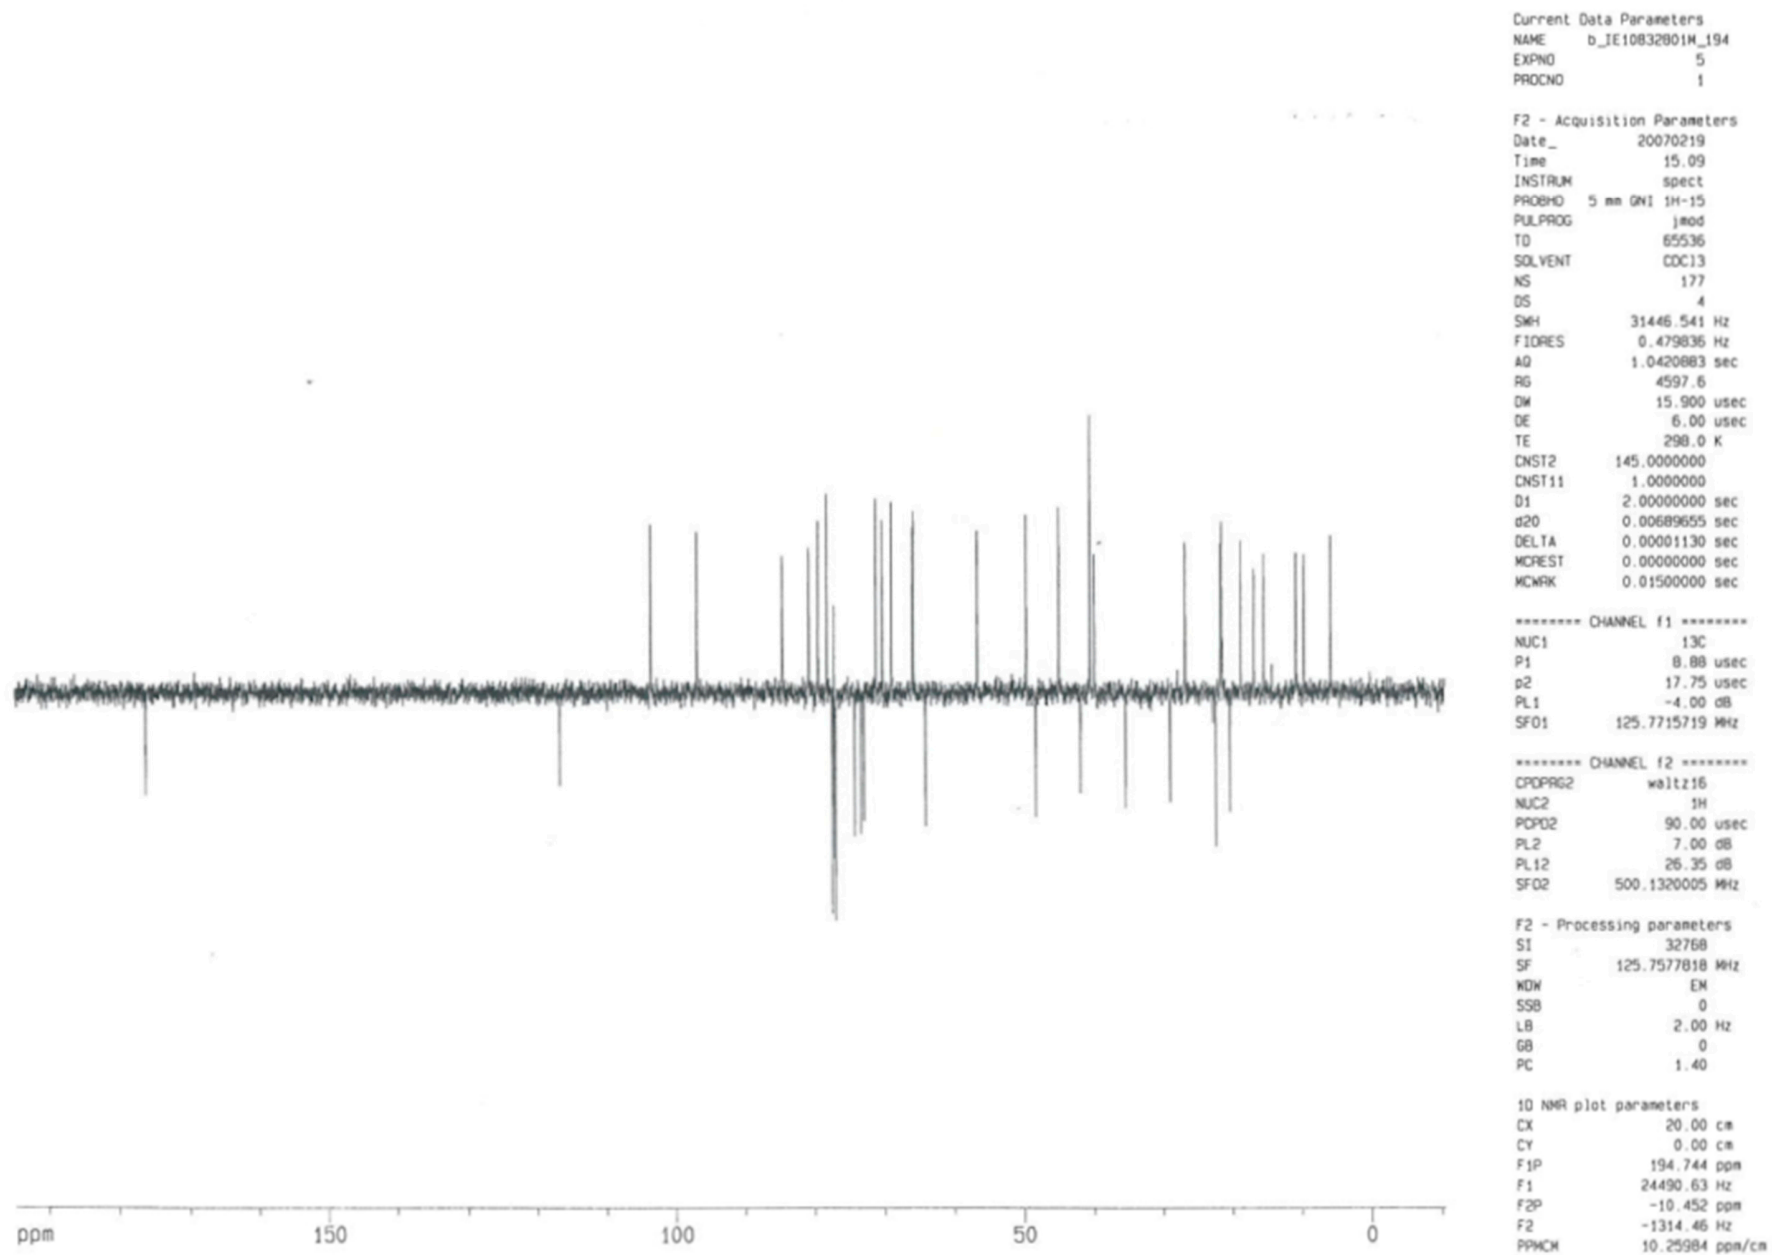

**Figure S18.**  $^{13}\text{C}$ -APT spectrum of **15b** in  $\text{CDCl}_3$  at 25 °C

**Table S1.** Comparison of  $^3J_{H,H}$  coupling constants for azithromycin, **3**, **10a** and **10b** in  $CDCl_3$  at 25 °C;  
\*overlapped, the largest difference marked in red

| Atom             | azithromycin | 3          | 10a        | 10b        | Atom               | azithromycin | 3    | 10a  | 10b  |
|------------------|--------------|------------|------------|------------|--------------------|--------------|------|------|------|
| <b>2, 3</b>      | <b>4.0</b>   | <b>4.1</b> | <b>8.7</b> | <b>9.0</b> | <b>2, 16</b>       | 7.5          | 6.9  | 7.2  | 7.3  |
| <b>3, 4</b>      | 2.0          | 1.6        | 1.8        | 1.7        | <b>4, 17</b>       | 7.5          | 7.3  | 7.3  | 7.3  |
| <b>4, 5</b>      | 7.5          | 6.7        | 7.0        | 6.1        | <b>8, 19</b>       | 6.5          | 7.1  | 7.0  | 7.0  |
| <b>7a, 8</b>     | < 1          | < 1        | < 1        | 1.1        | <b>10, 20</b>      | 6.8          | 6.9  | 6.4  | 6.4  |
| <b>7b, 8</b>     | *            | 7.4        | *          | *          | <b>14, 15</b>      | 7.5          | 7.4  | 7.5  | 7.3  |
| <b>8, 9a</b>     | < 1          | *          | < 1        | 3.5        | <b>5', 6'</b>      | 6.1          | 6.0  | 6.4  | 6.1  |
| <b>8, 9b</b>     | 11.0         | 11.0       | 12.1       | 12.5       | <b>5'', 6''</b>    | 6.3          | 6.0  | 6.2  | 6.4  |
| <b>10, 11</b>    | 1.2          | 1.2        | 1.8        | 1.8        |                    |              |      |      |      |
| <b>13, 14a</b>   | 2.8          | 1.6        | 2.0        | 2.0        | <b>11, 11 OH</b>   | 6.6          | < 1  | -    | -    |
| <b>13, 14b</b>   | 9.8          | 9.4        | 11.1       | 11.1       | <b>2', 2' OH</b>   | +            | n/a  | n/a  | n/a  |
| <b>22, 23eq</b>  | -            | 4.9        | 2.9        | 3.7        | <b>4'', 4'' OH</b> | 10.5         | 10.2 | n/a  | n/a  |
| <b>22, 23ax</b>  | -            | 7.4        | 10.7       | 10.8       |                    |              |      |      |      |
| <b>22, L1a</b>   | -            | 16.0       | 4.9        | 7.2        | <b>7a, 7b</b>      | 14.7         | 14.2 | 14.5 | 14.7 |
| <b>22, L1b</b>   | -            | -          | 8.2        | 4.0        | <b>9a, 9b</b>      | 11.0         | 10.5 | 12.1 | 12.5 |
| <b>q2, q3</b>    | -            | -          |            | 4.6        | <b>14a, 14b</b>    | 14.4         | 14.5 | 14.4 | 14.4 |
| <b>q3, q4</b>    | -            | -          | 8.5        | -          | <b>4'a, 4'b</b>    | 12.6         | 13.0 | 12.5 | *    |
| <b>q5, q6</b>    | -            | 8.2        | 8.2        | 7.0        | <b>2''a, 2''b</b>  | 15.2         | 15.0 | 14.7 | 14.7 |
| <b>q6, q7</b>    | -            | 7.6        | 6.9        | 8.2        | <b>23a, 23b</b>    | -            | 14.5 | 11.6 | 8.5  |
| <b>q7, q8</b>    | -            | 8.3        | 8.2        | 7.6        | <b>L1a, L1b</b>    | -            | -    | 15.0 | 15.6 |
| <b>1', 2'</b>    | 7.3          | 7.2        | 7.3        | 7.3        |                    |              |      |      |      |
| <b>2', 3'</b>    | 10.3         | 9.8        | 10.4       | 9.9        |                    |              |      |      |      |
| <b>3', 4'a</b>   | 3.8          | 3.6        | 4.0        | *          |                    |              |      |      |      |
| <b>3', 4'b</b>   | 12.2         | 13.0       | 12.0       | *          |                    |              |      |      |      |
| <b>4'a, 5'</b>   | 1.9          | < 1        | 2.1        | 2.0        |                    |              |      |      |      |
| <b>4'b, 5'</b>   | 11.0         | 10.4       | 10.2       | 10.2       |                    |              |      |      |      |
| <b>1'', 2''a</b> | < 1          | < 1        | 1.4        | 2.4        |                    |              |      |      |      |
| <b>1'', 2''b</b> | 5.0          | 4.6        | 4.6        | 4.3        |                    |              |      |      |      |
| <b>4'', 5''</b>  | 9.6          | 9.6        | 8.8        | 8.8        |                    |              |      |      |      |
